# Supplementary material for: Diversity Outbred Mice at 21: Maintaining Allelic Variation in the Face of Selection
Source: PubMed Central journal article supplement (PMC5144960; doi:10.1534/g3.116.035527), 2016-09-29

CHR 1

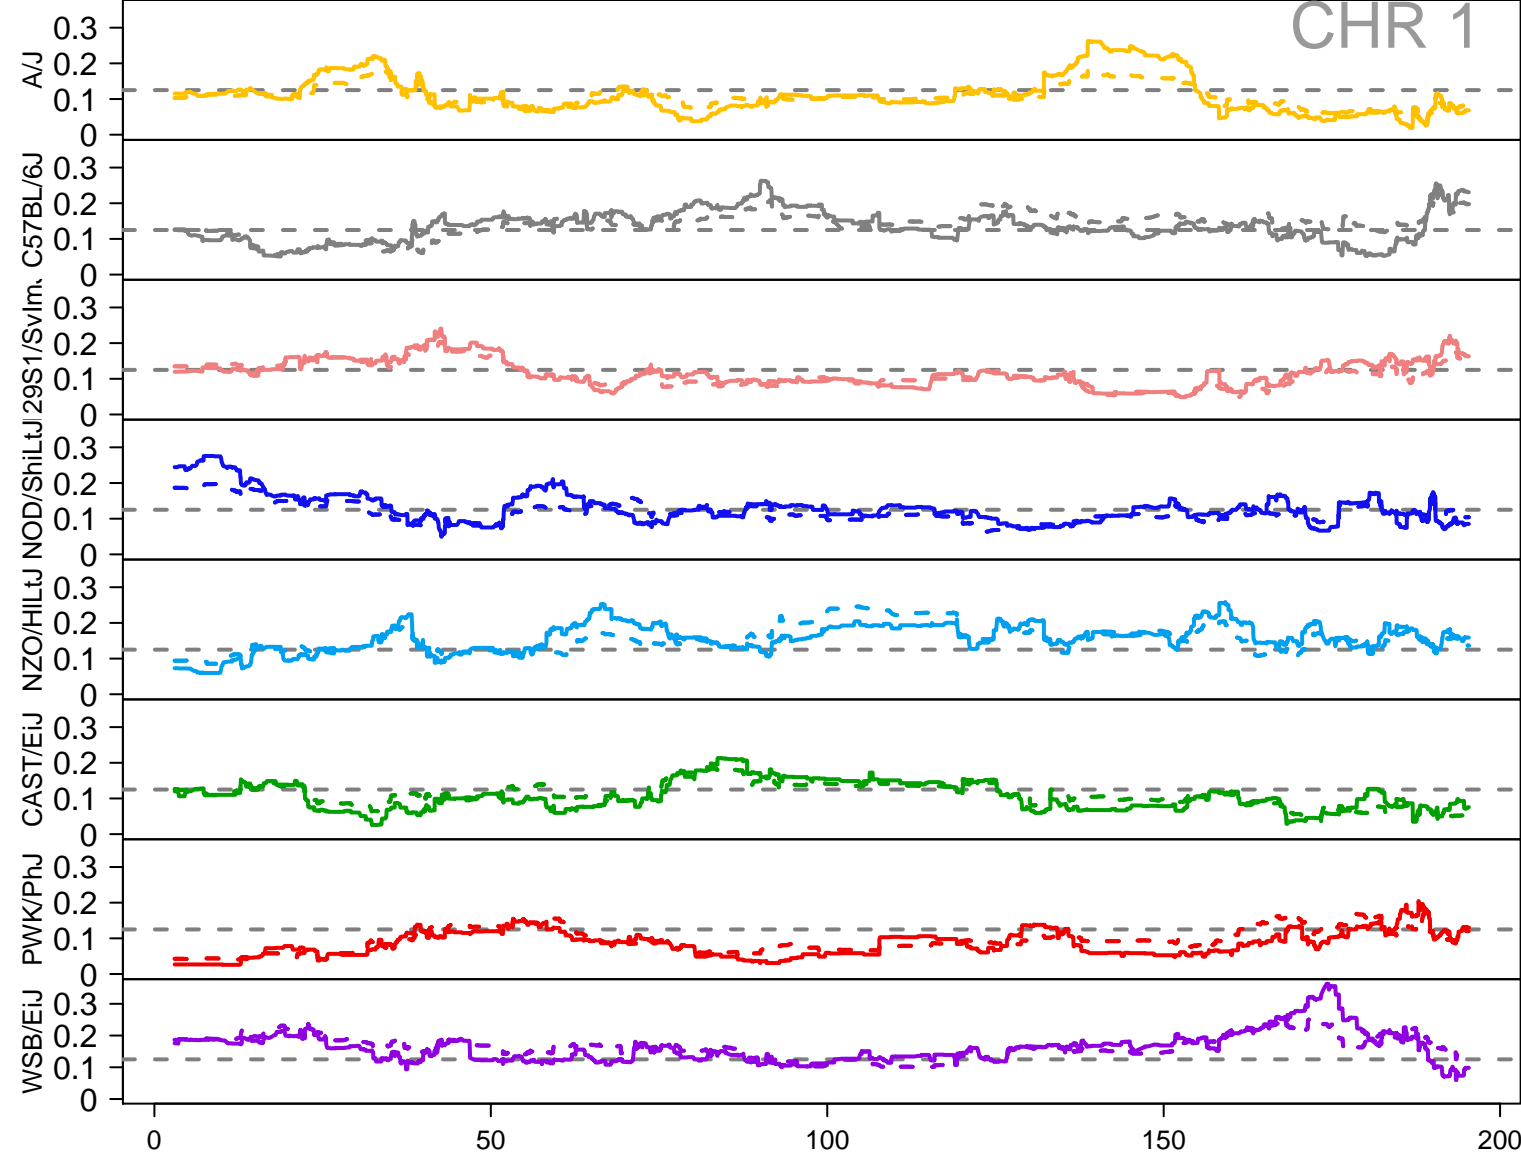

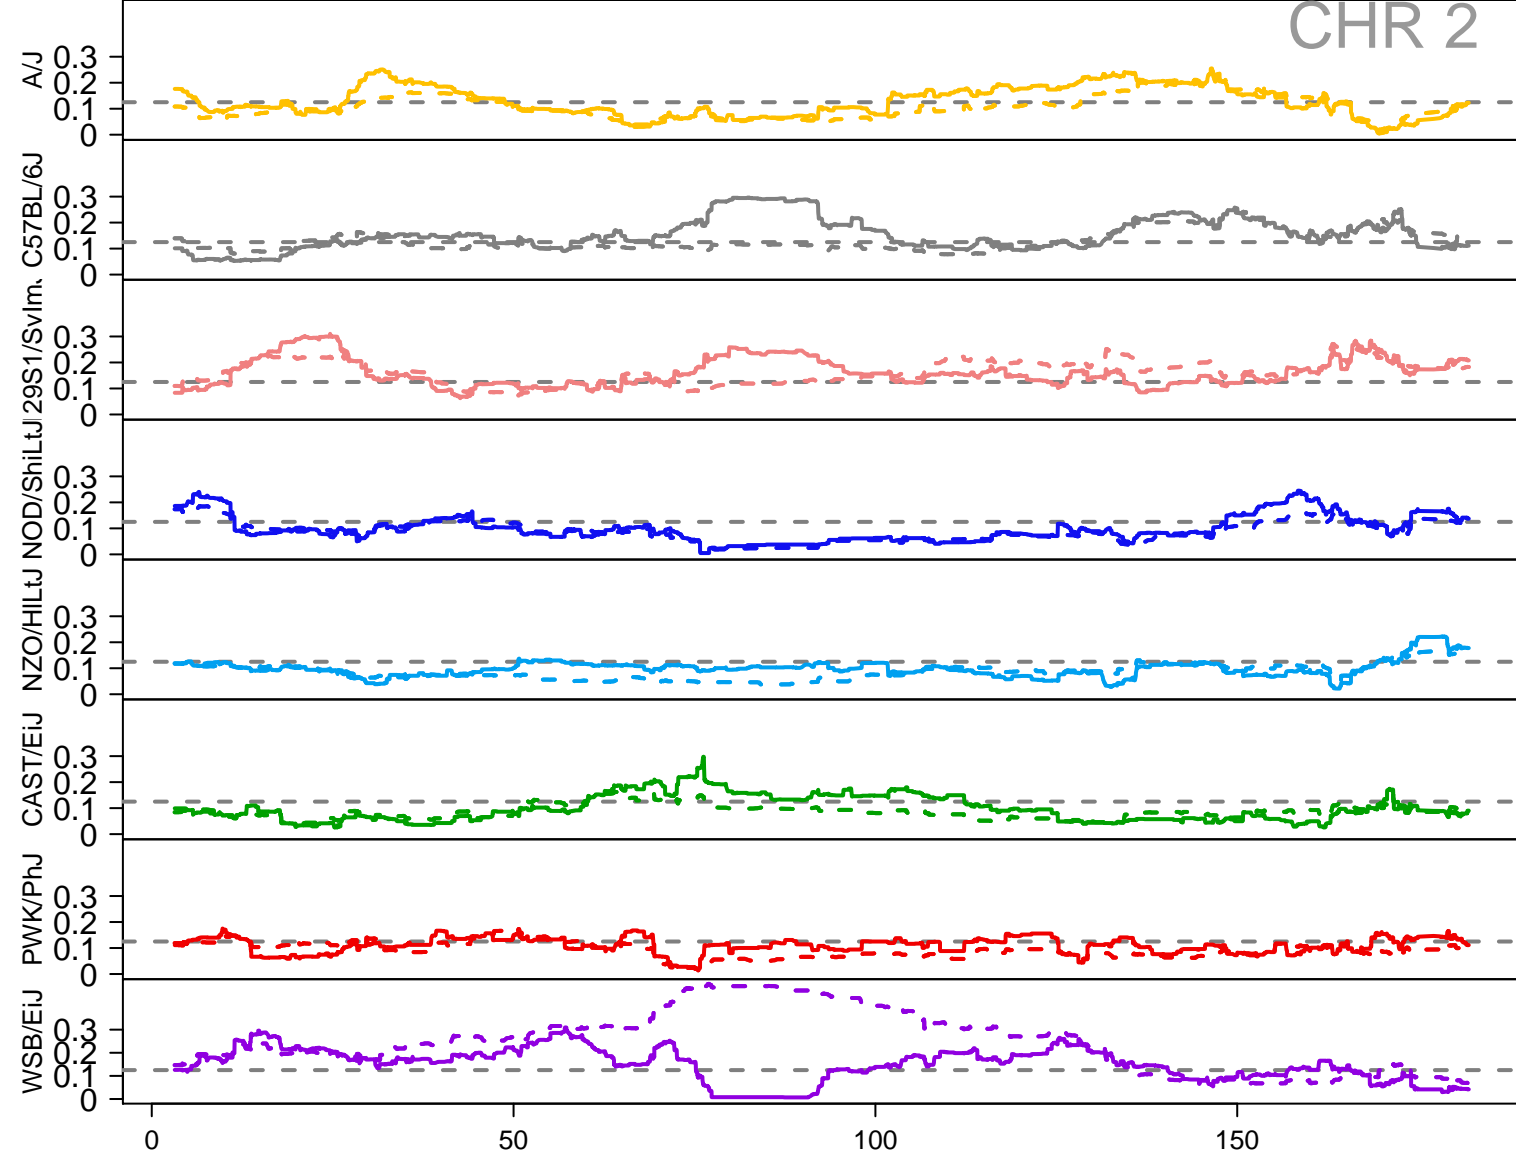

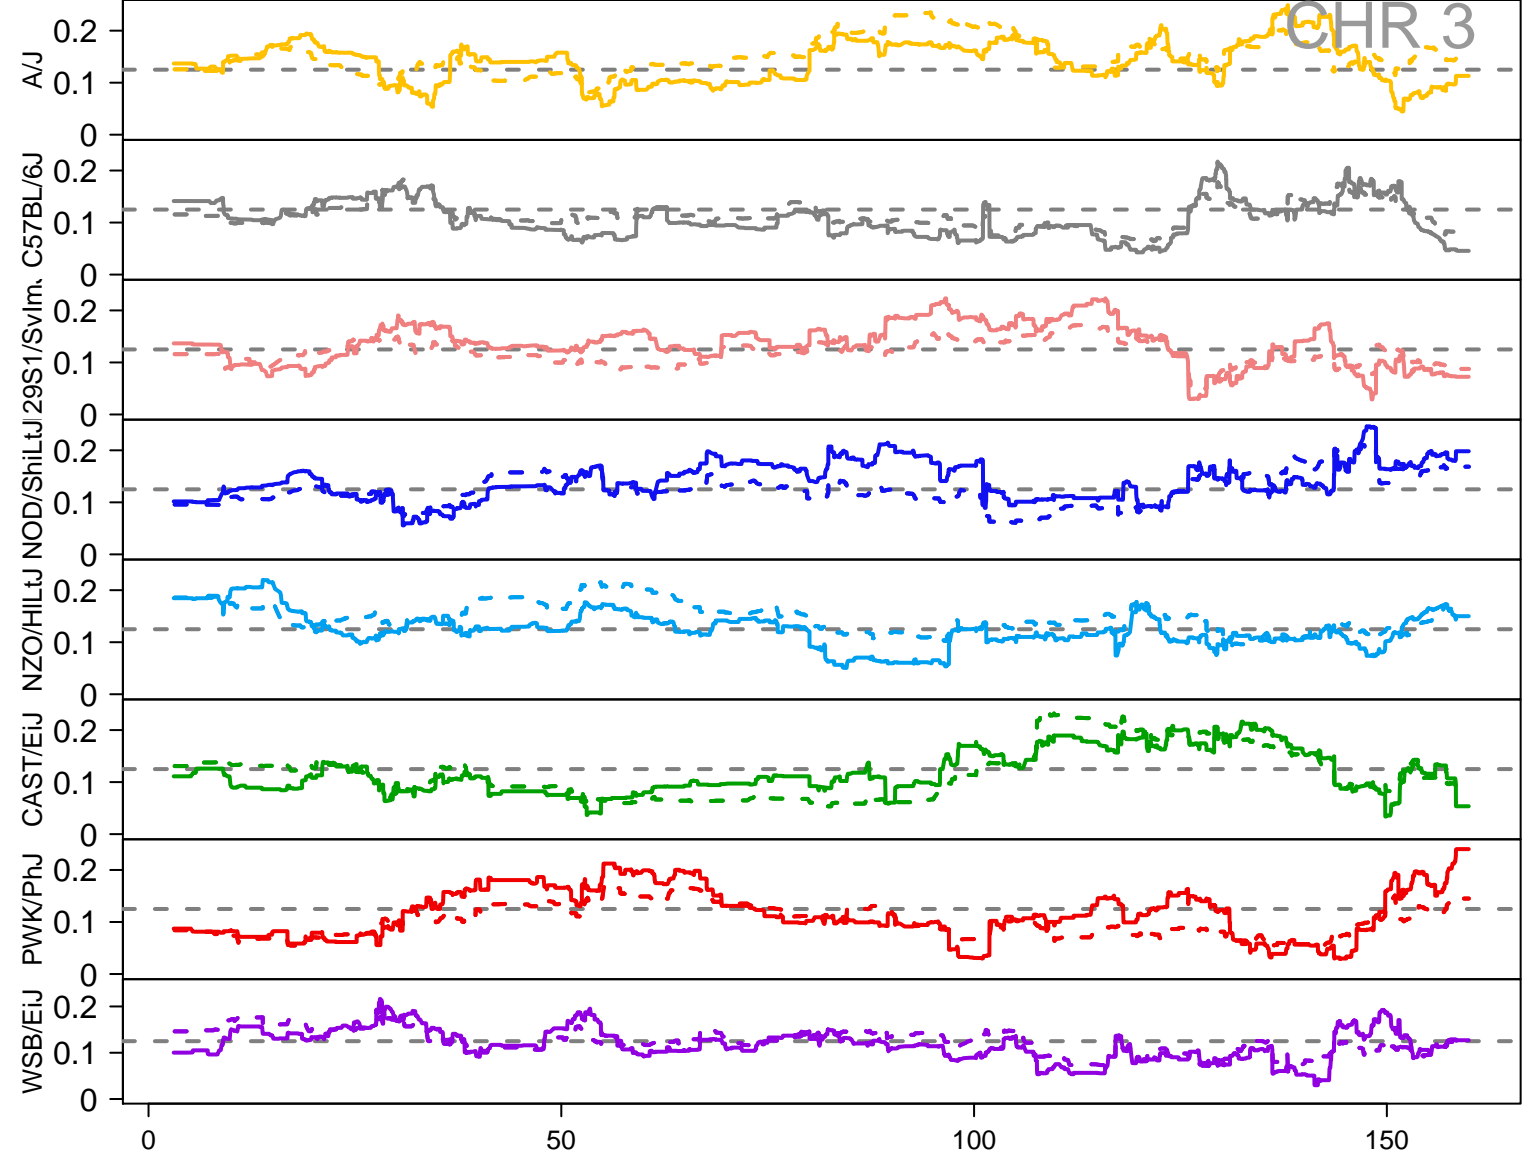

CHR 4

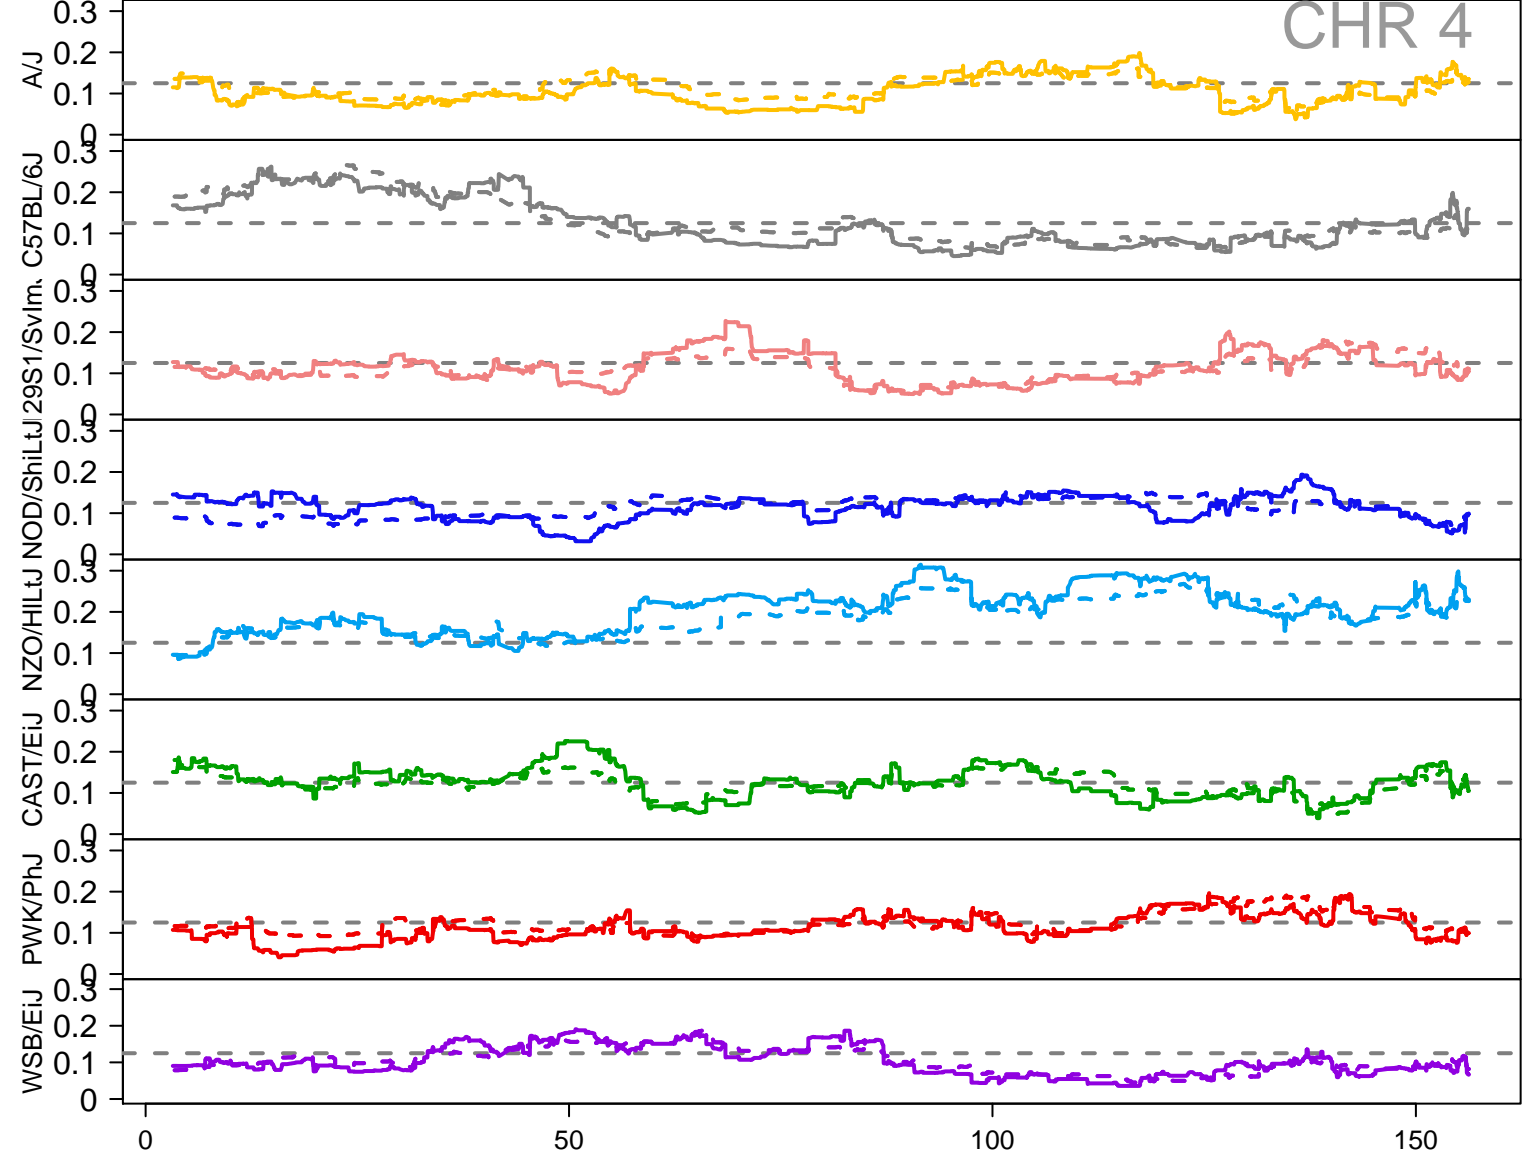

CHR 5

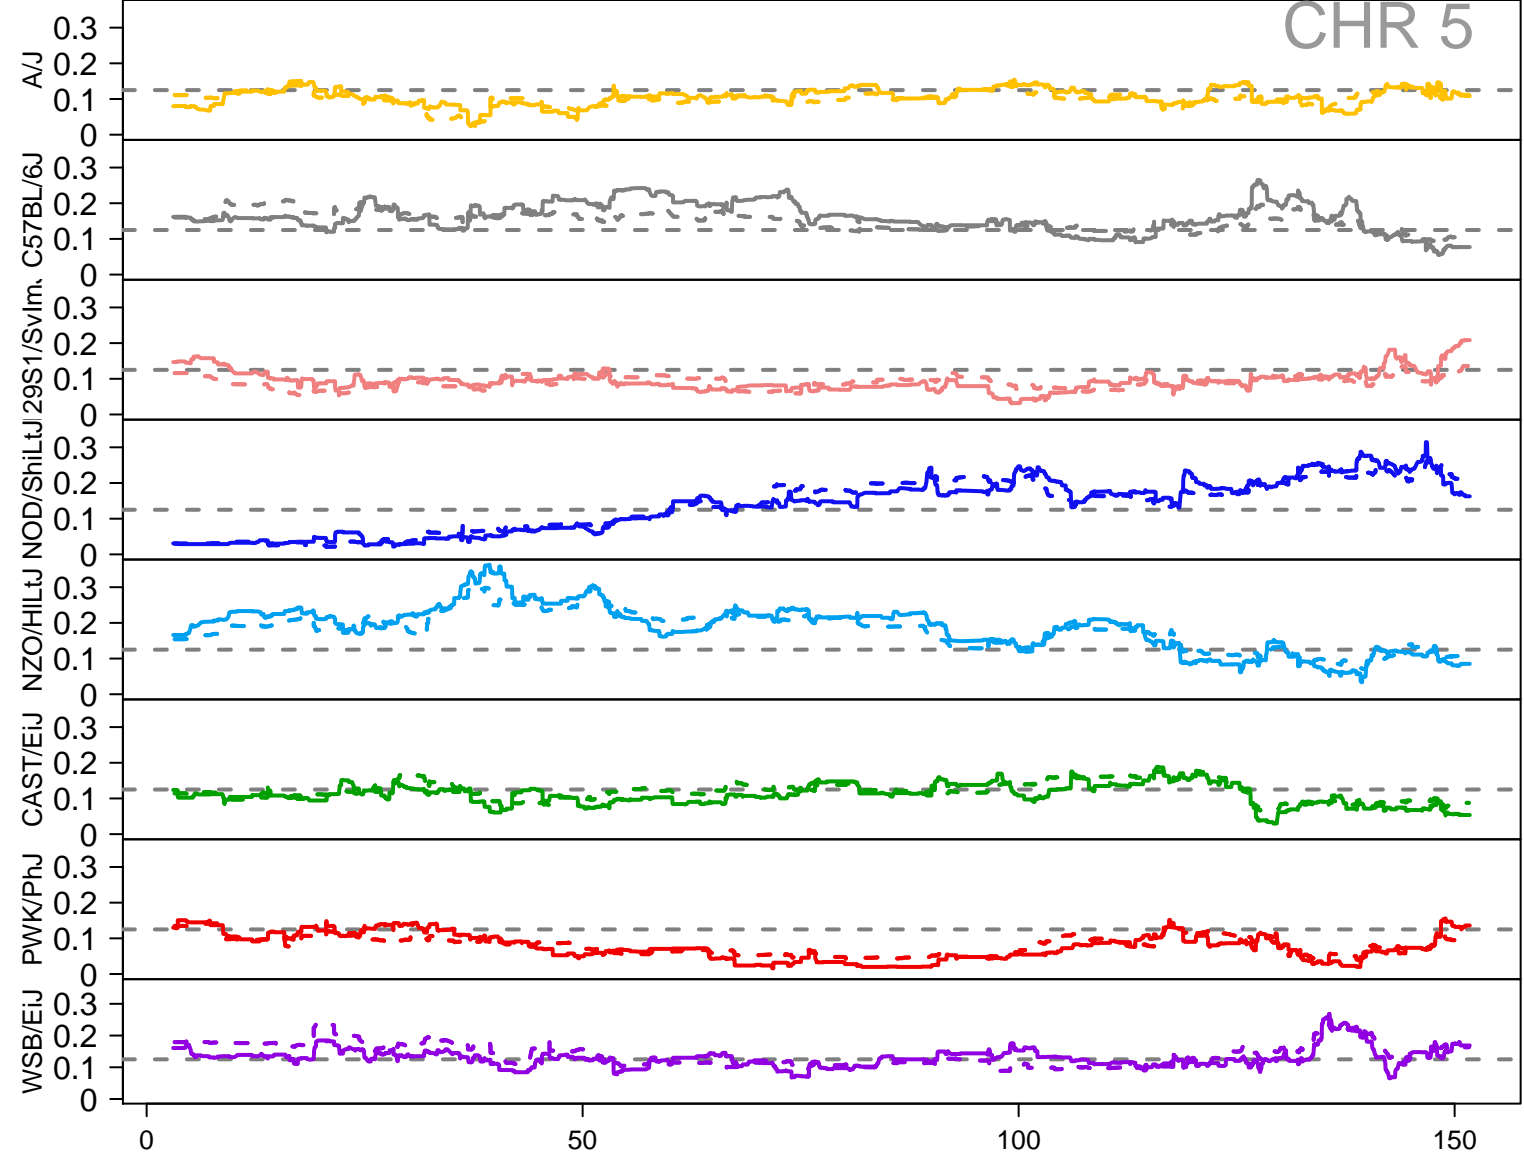

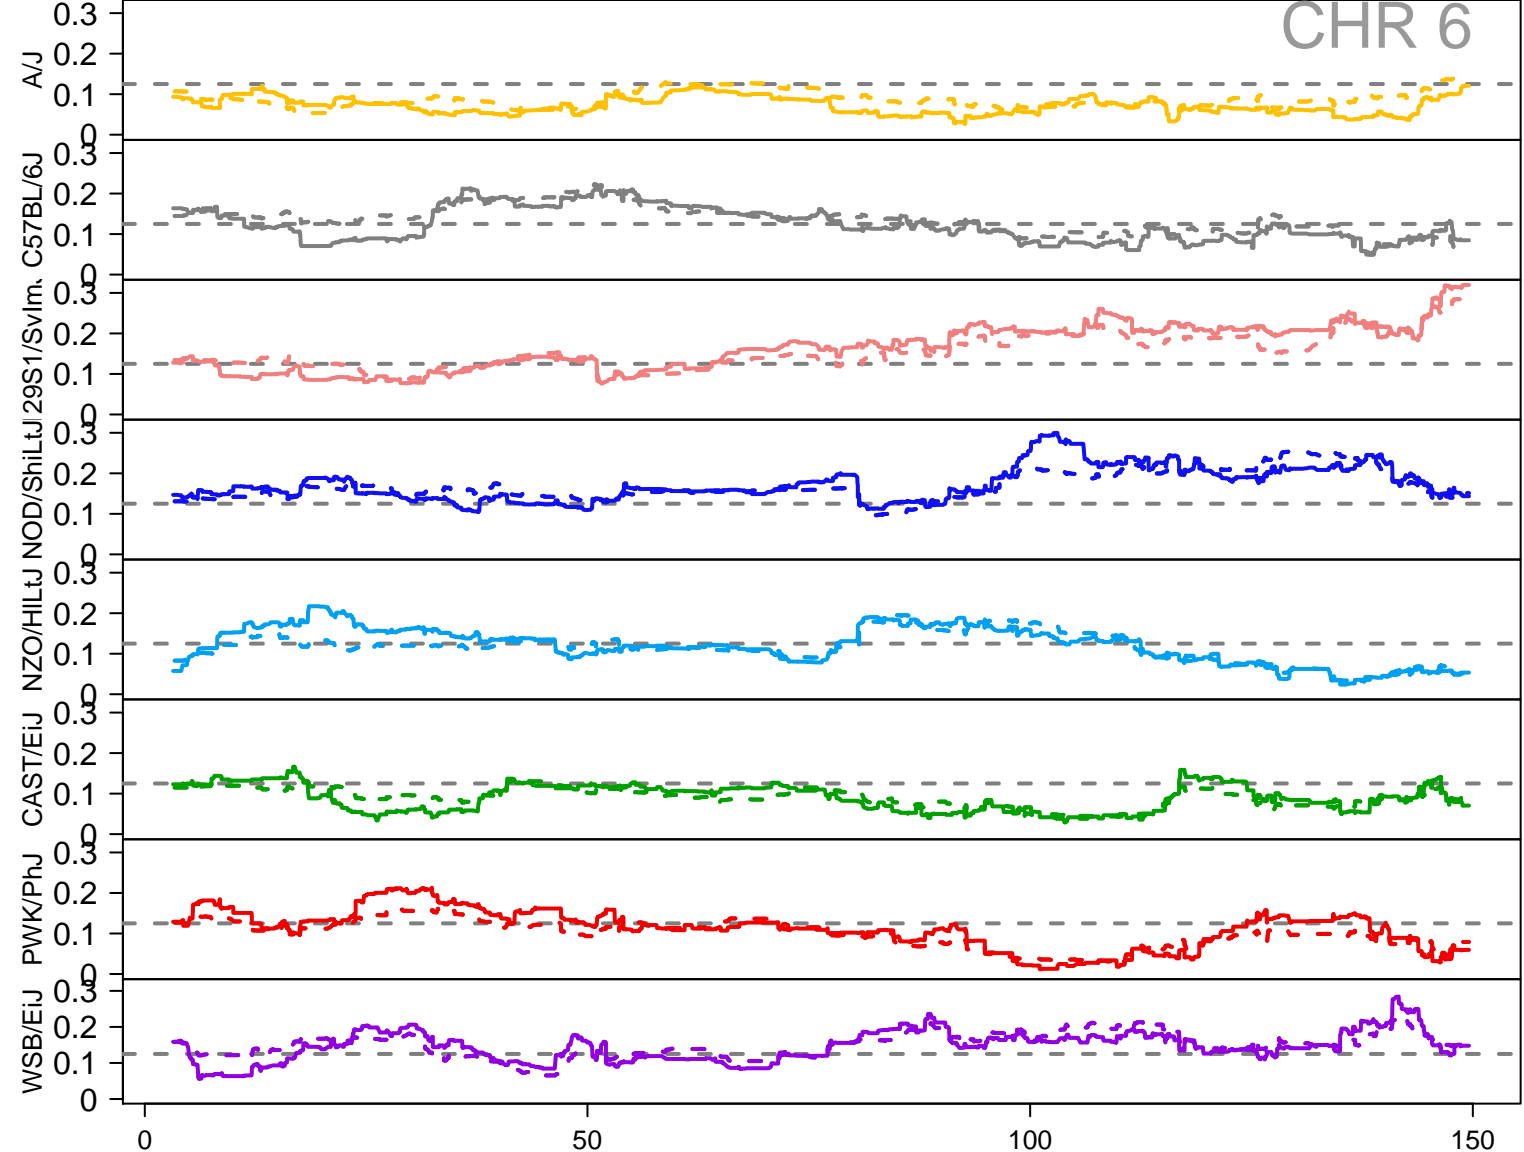

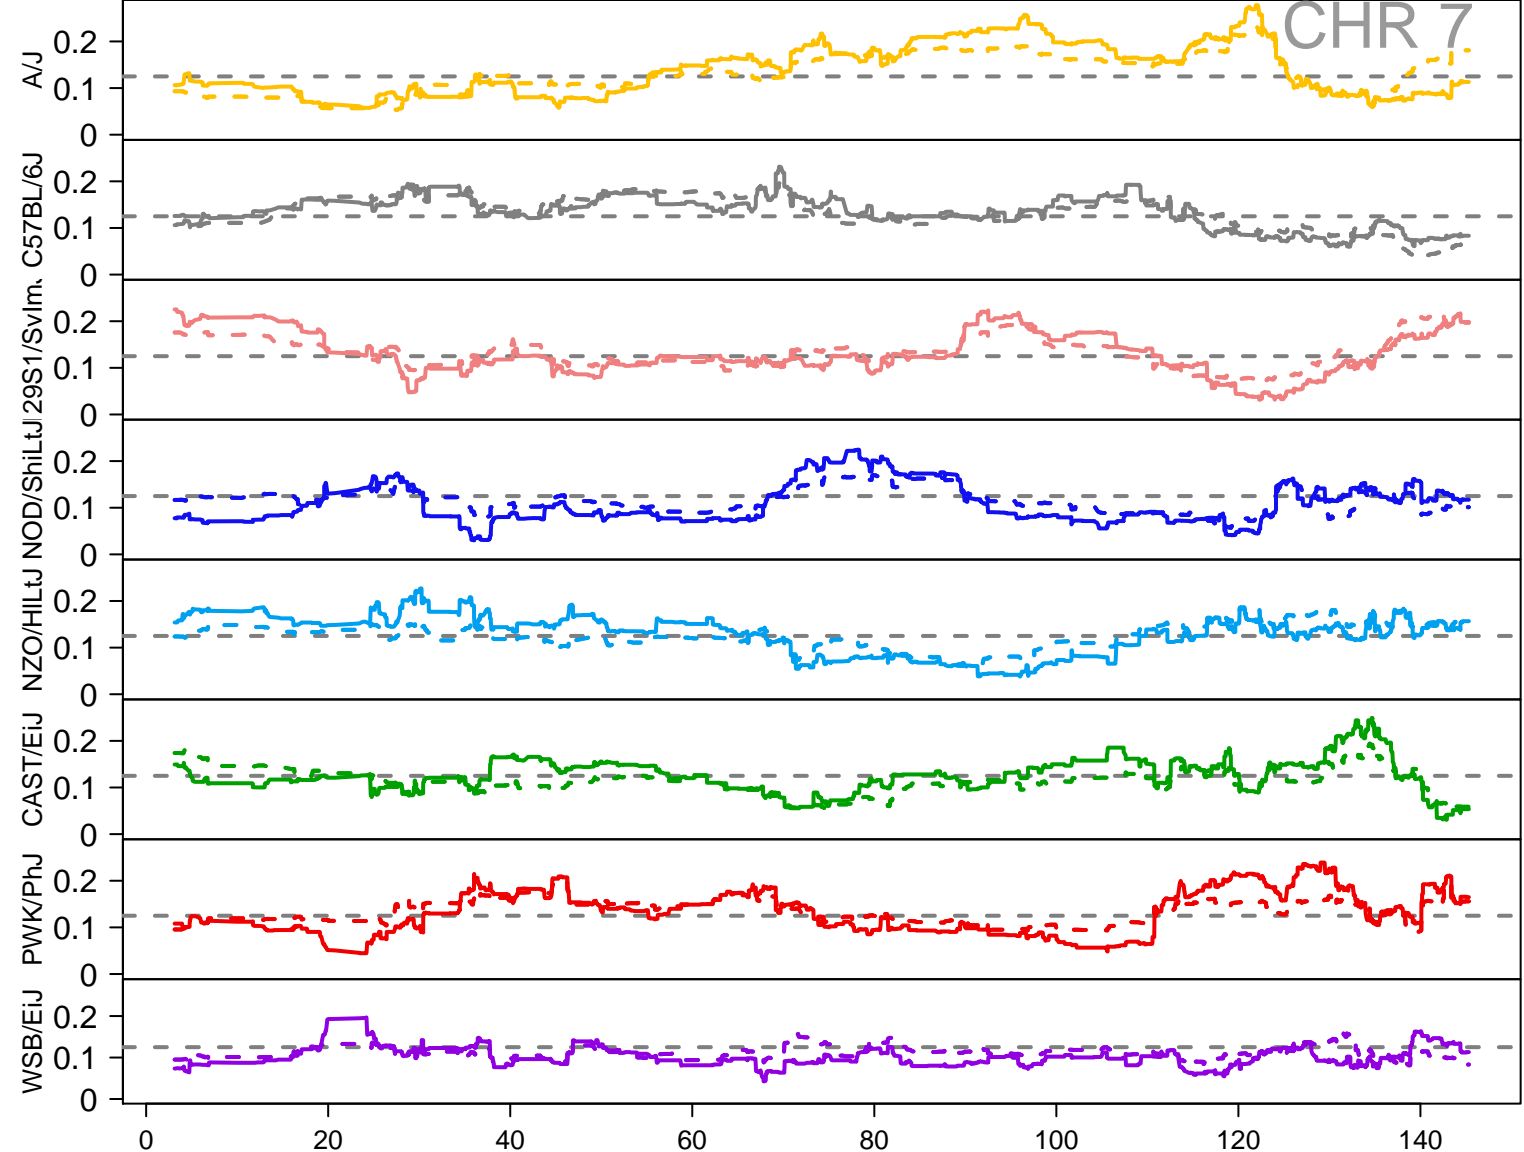

CHR 8

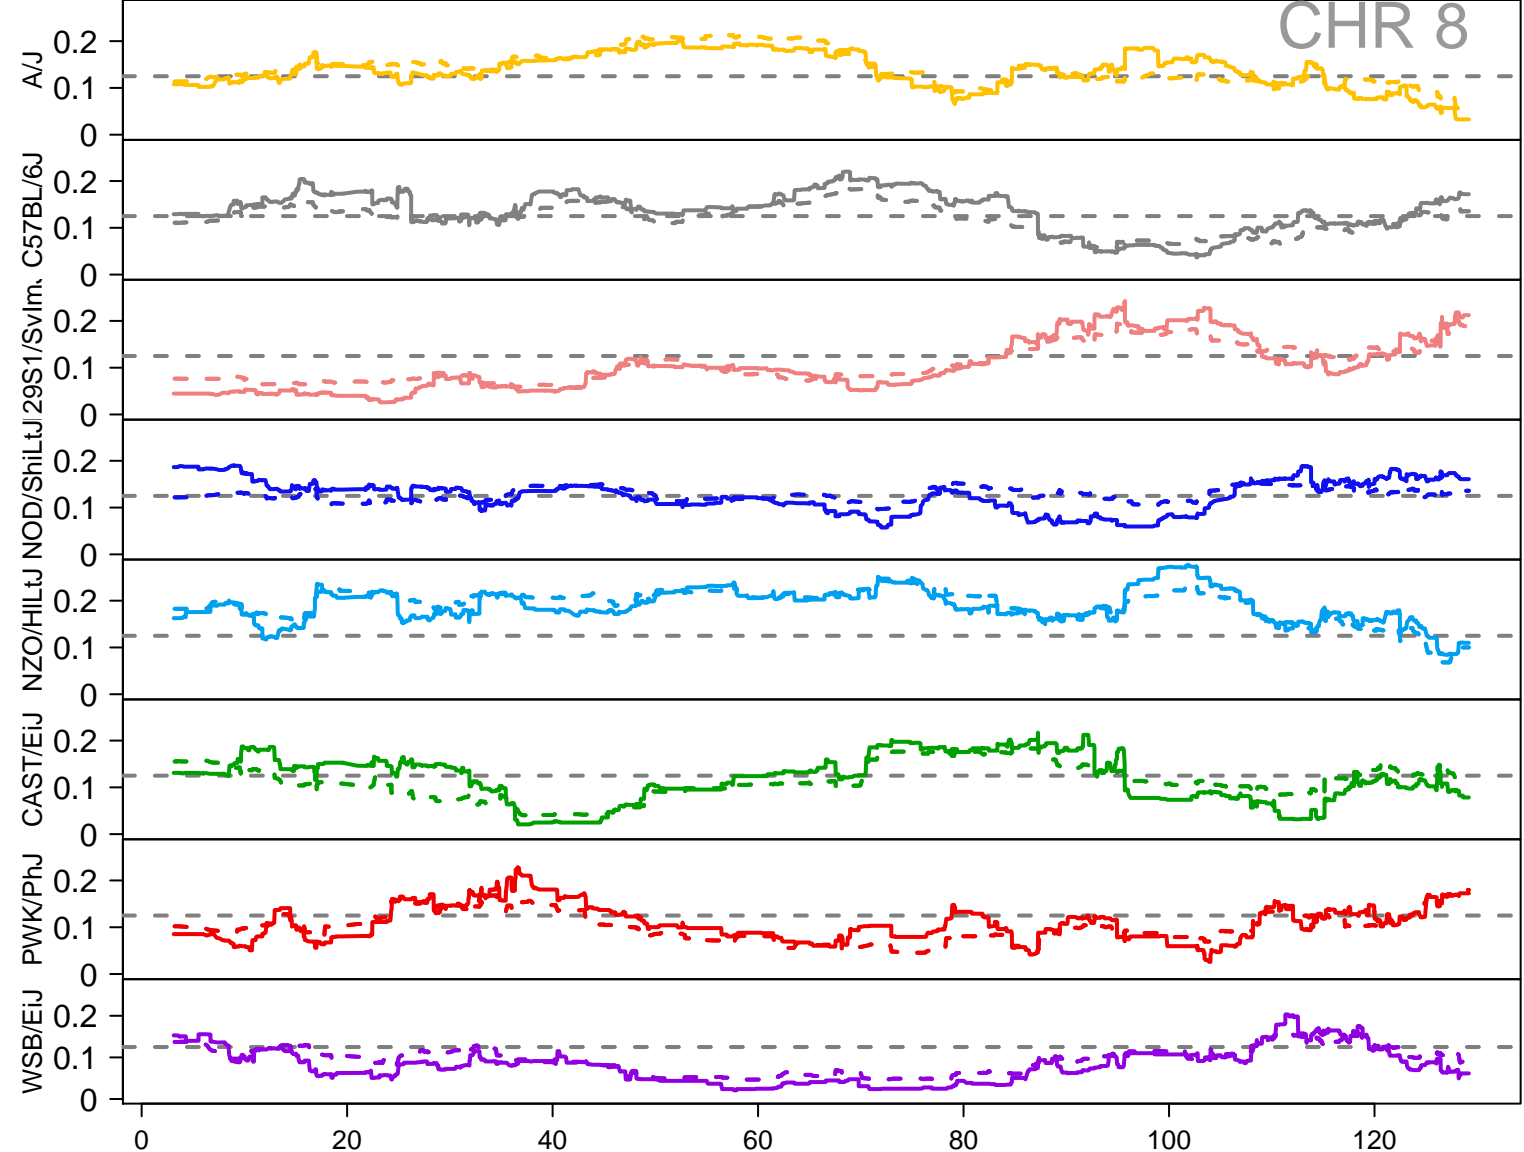



# CHR 9

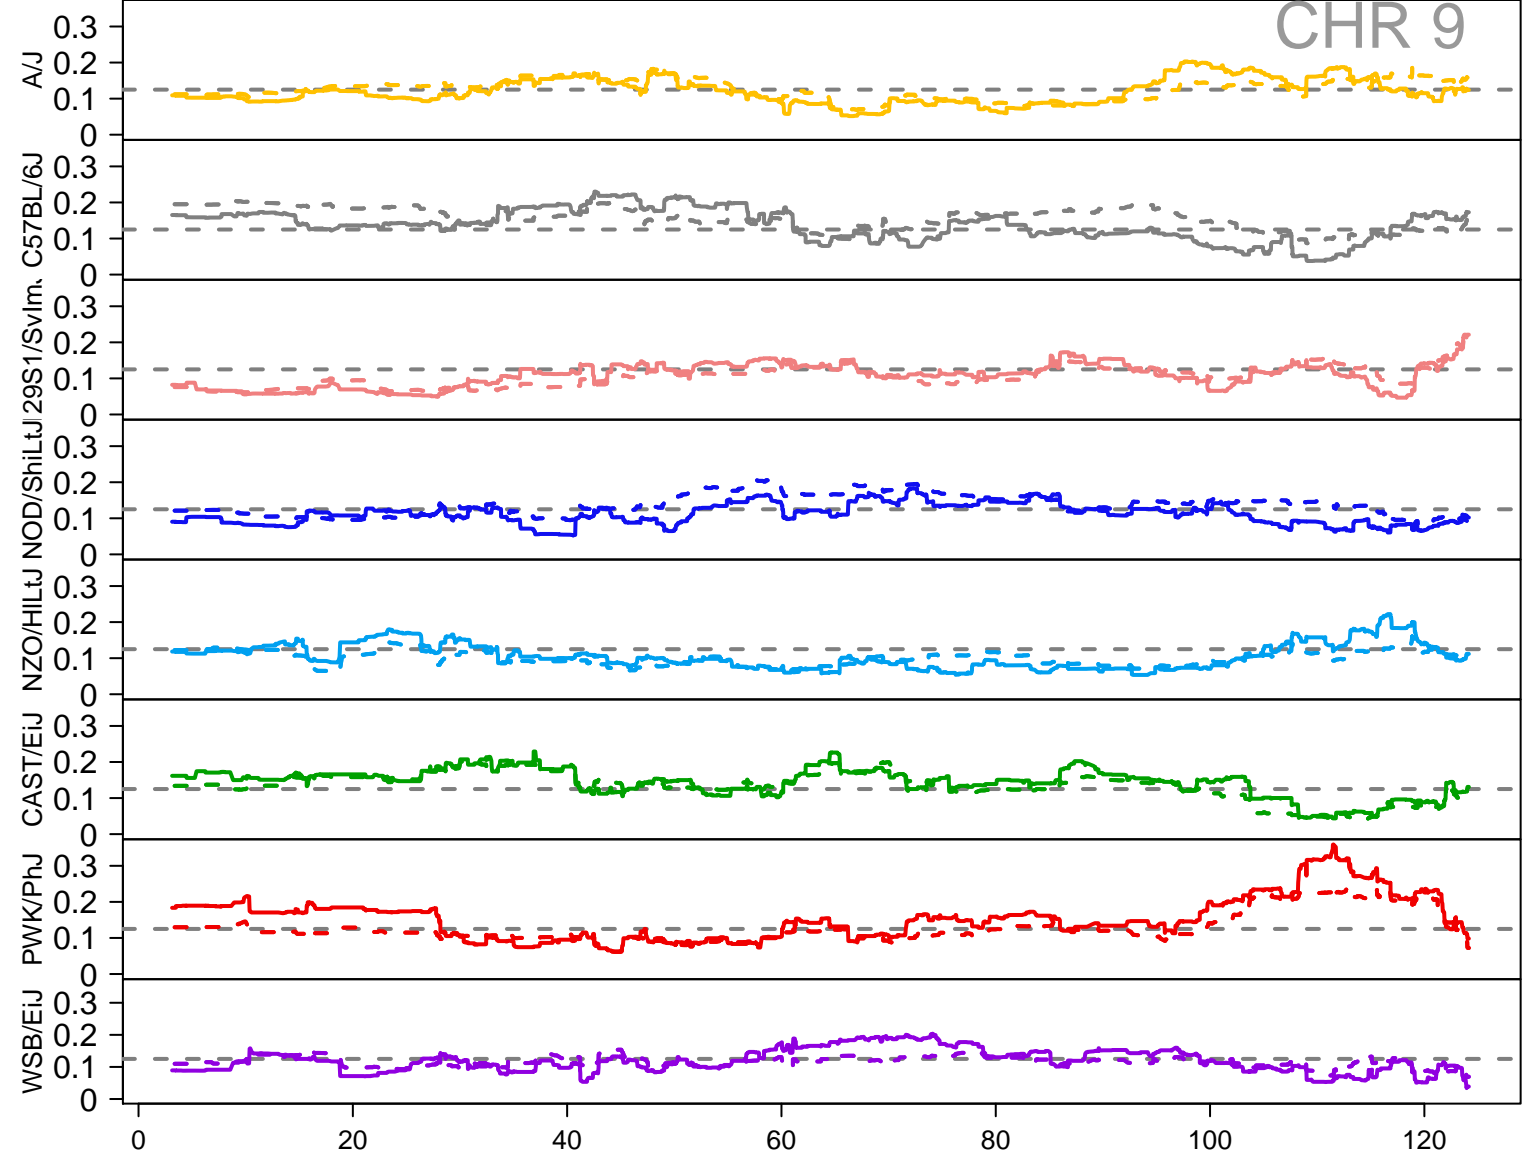

# CHR 10

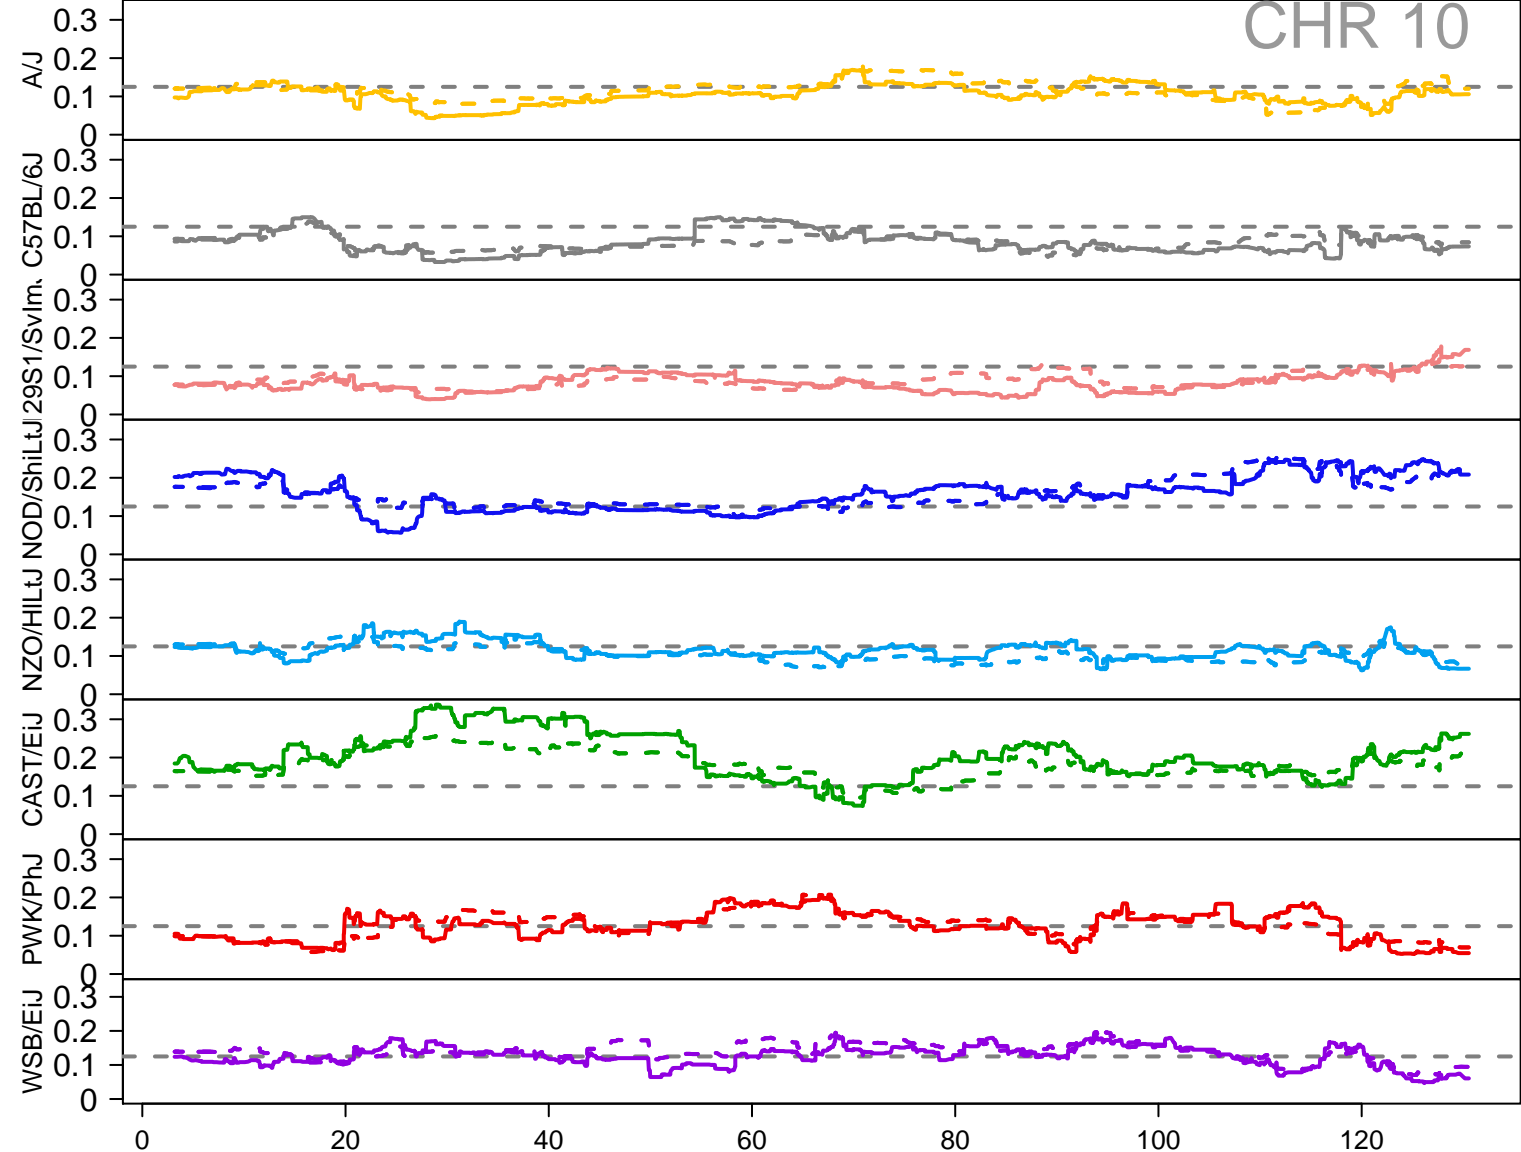

CHR 11

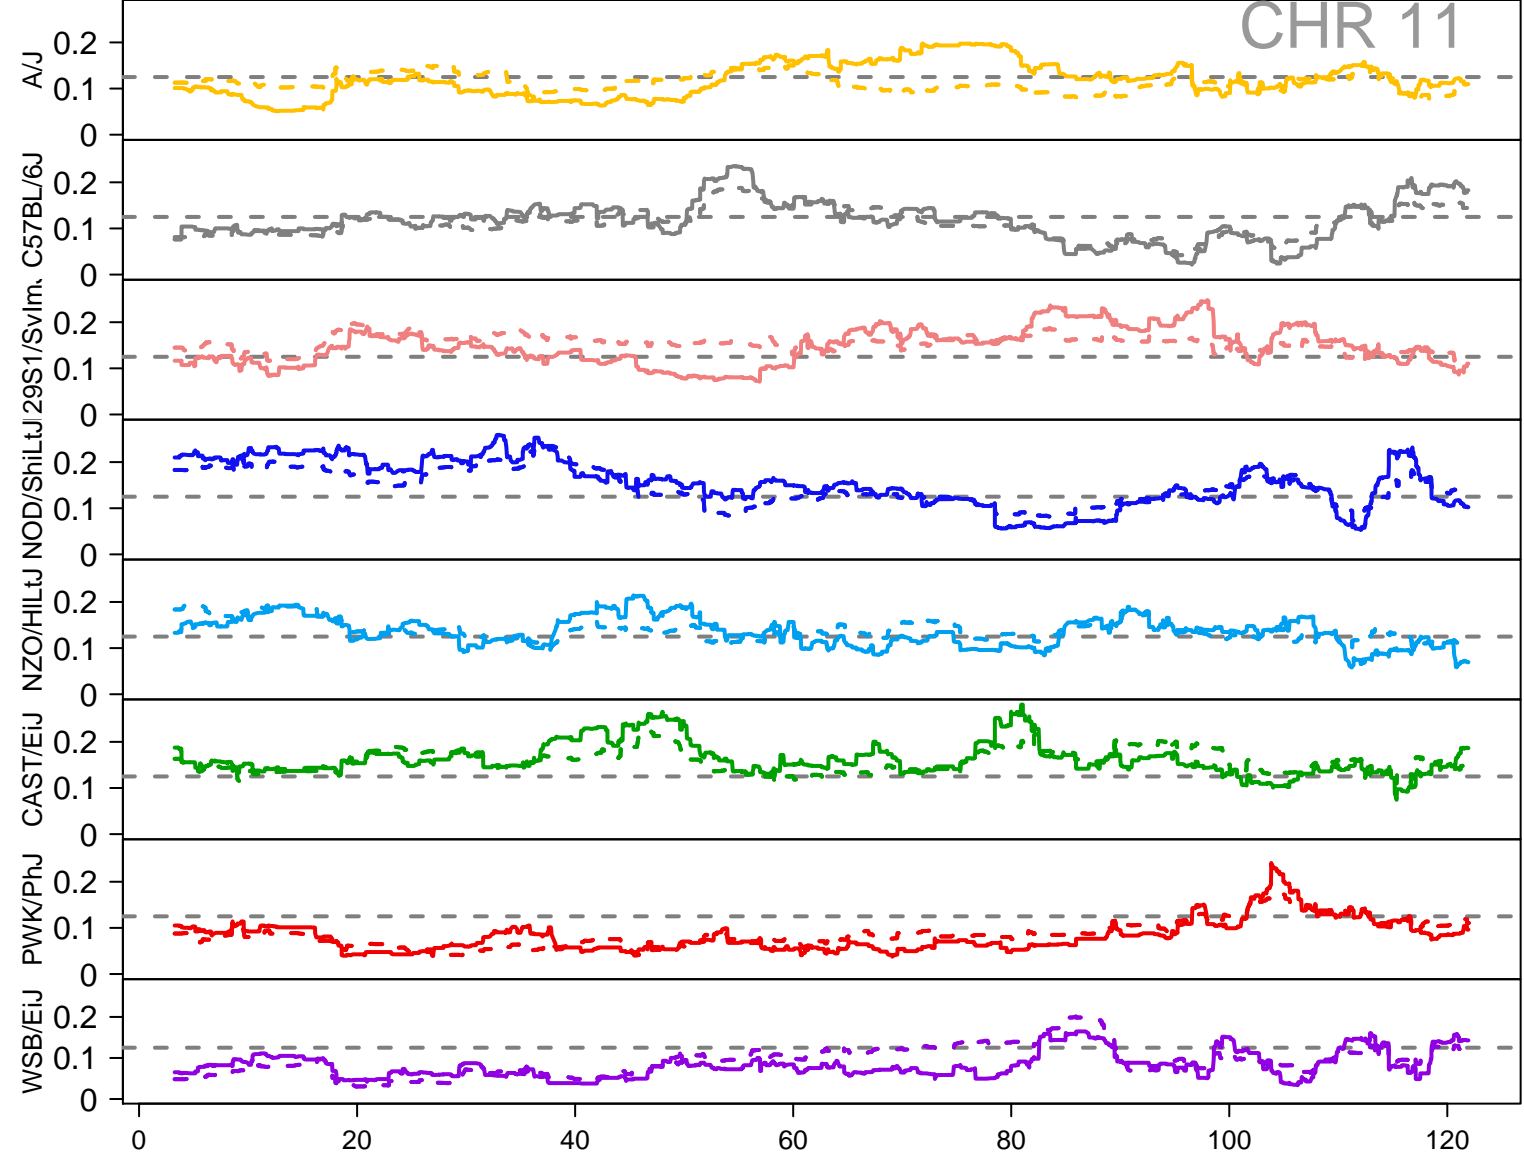

CHR 12

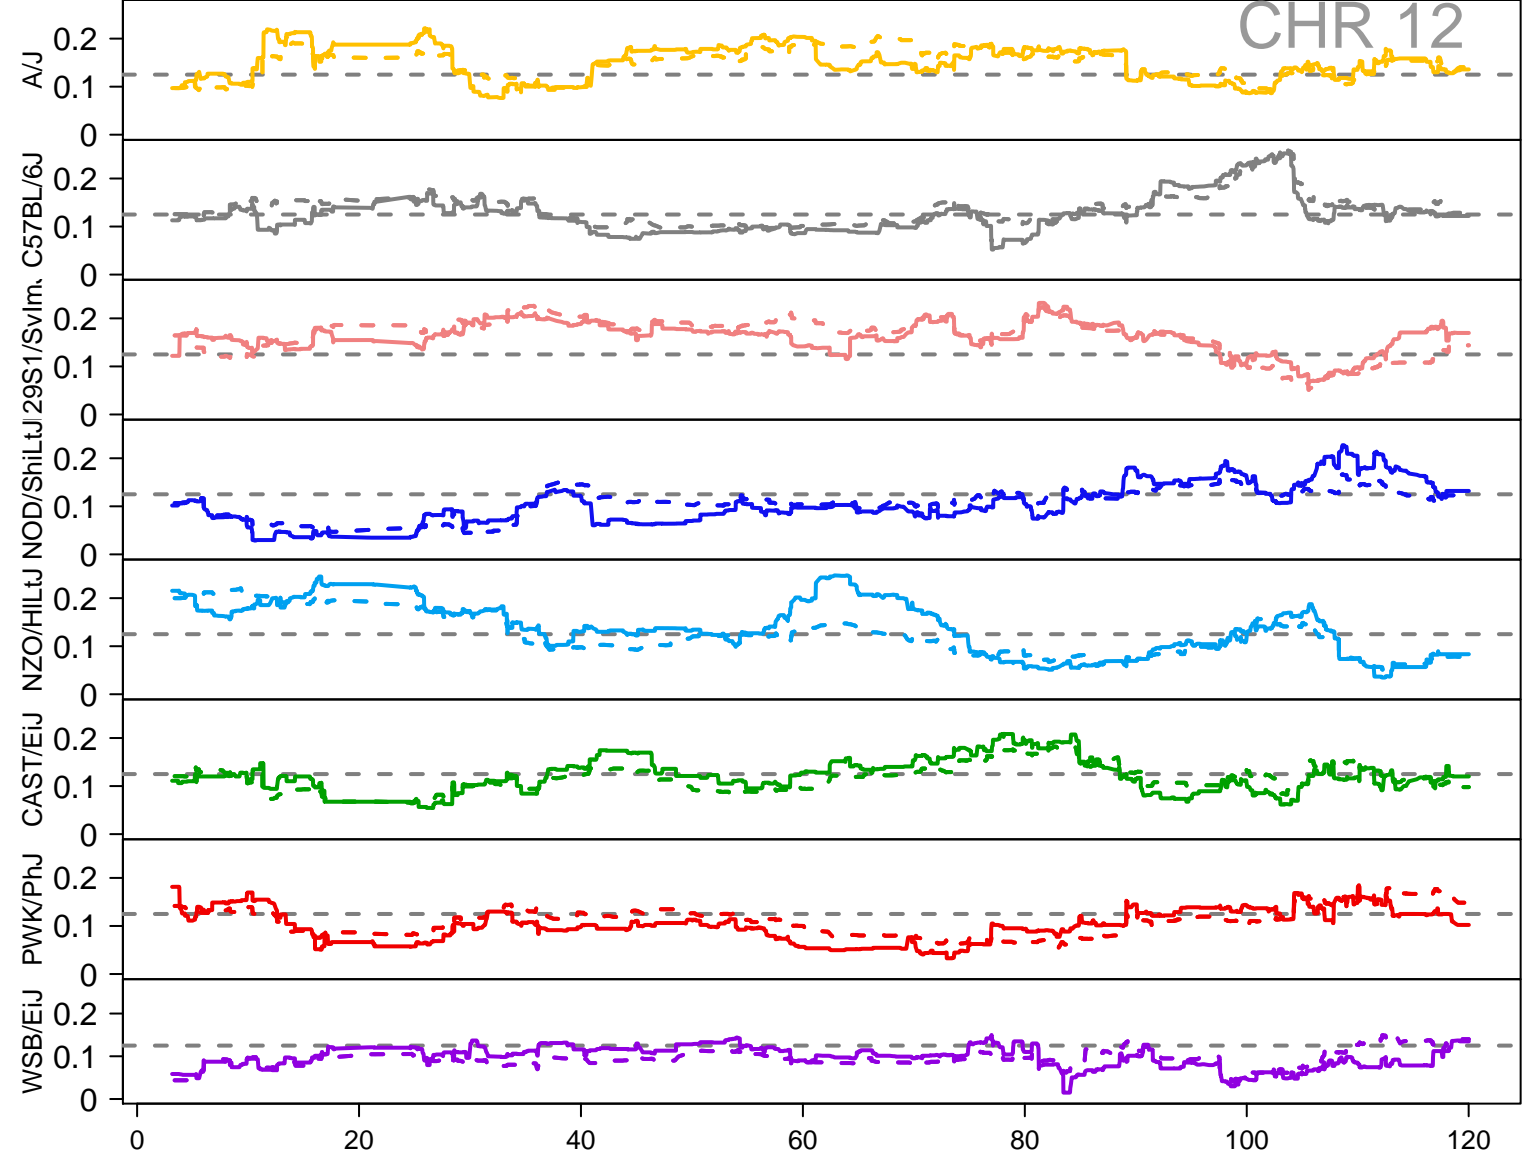

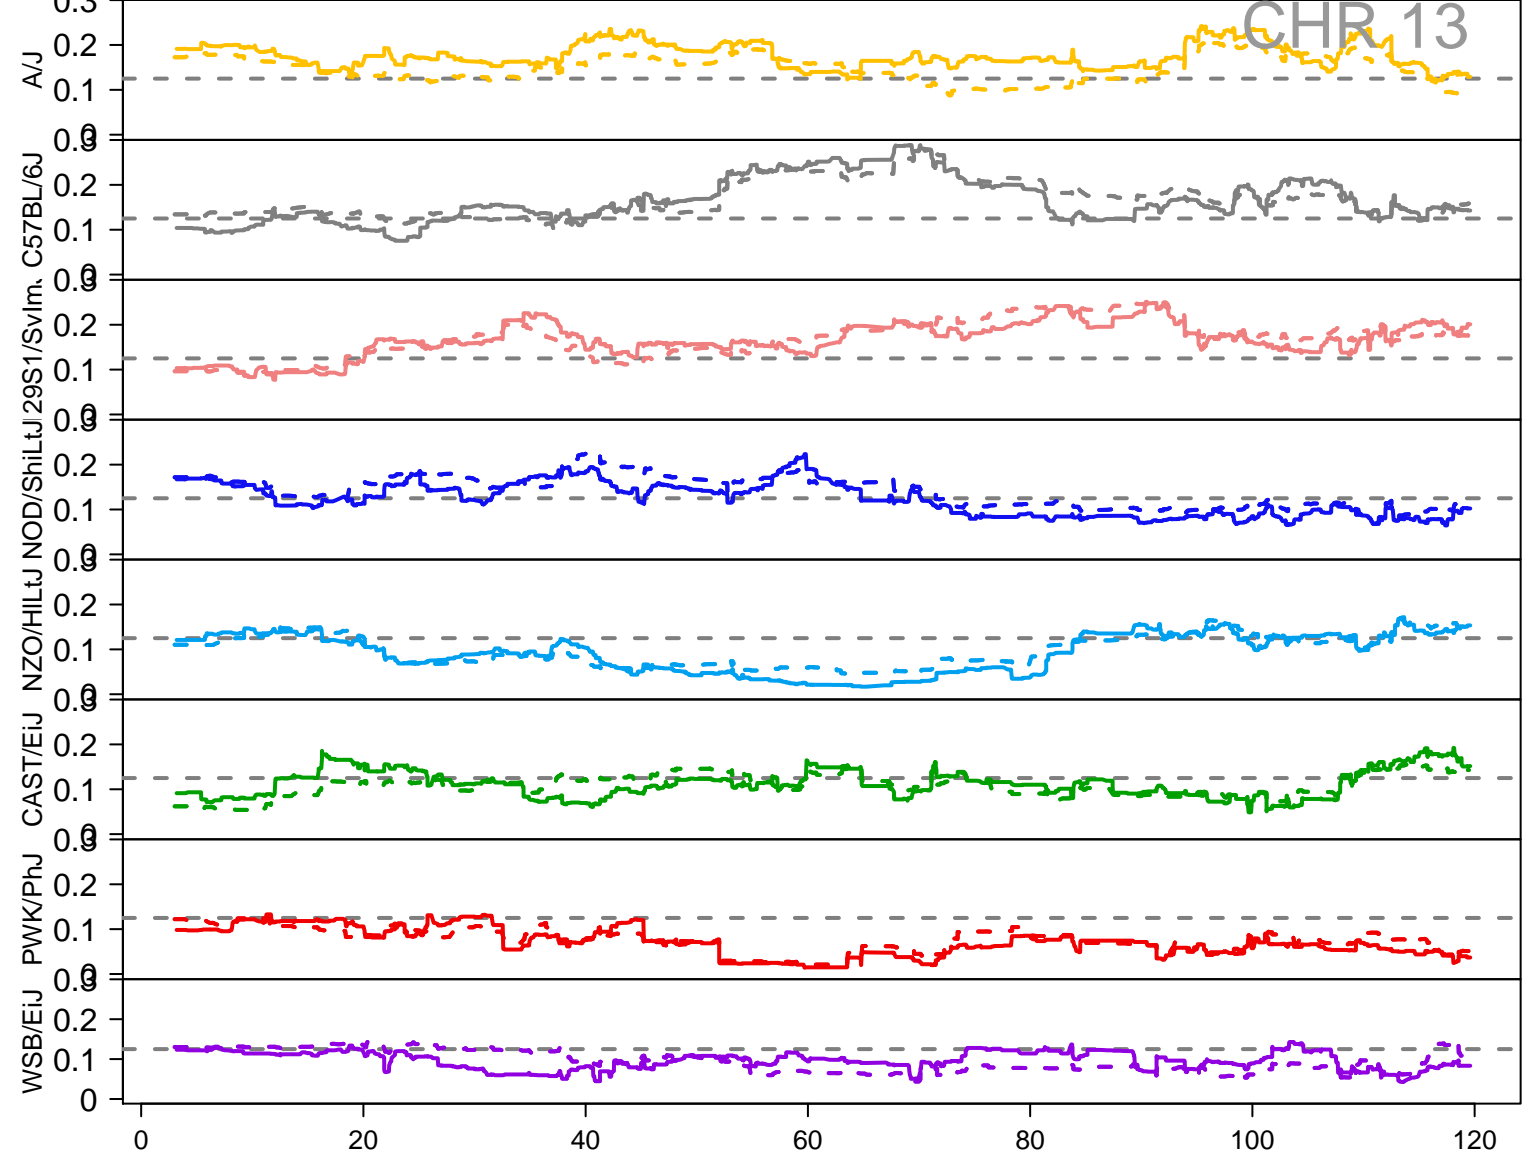



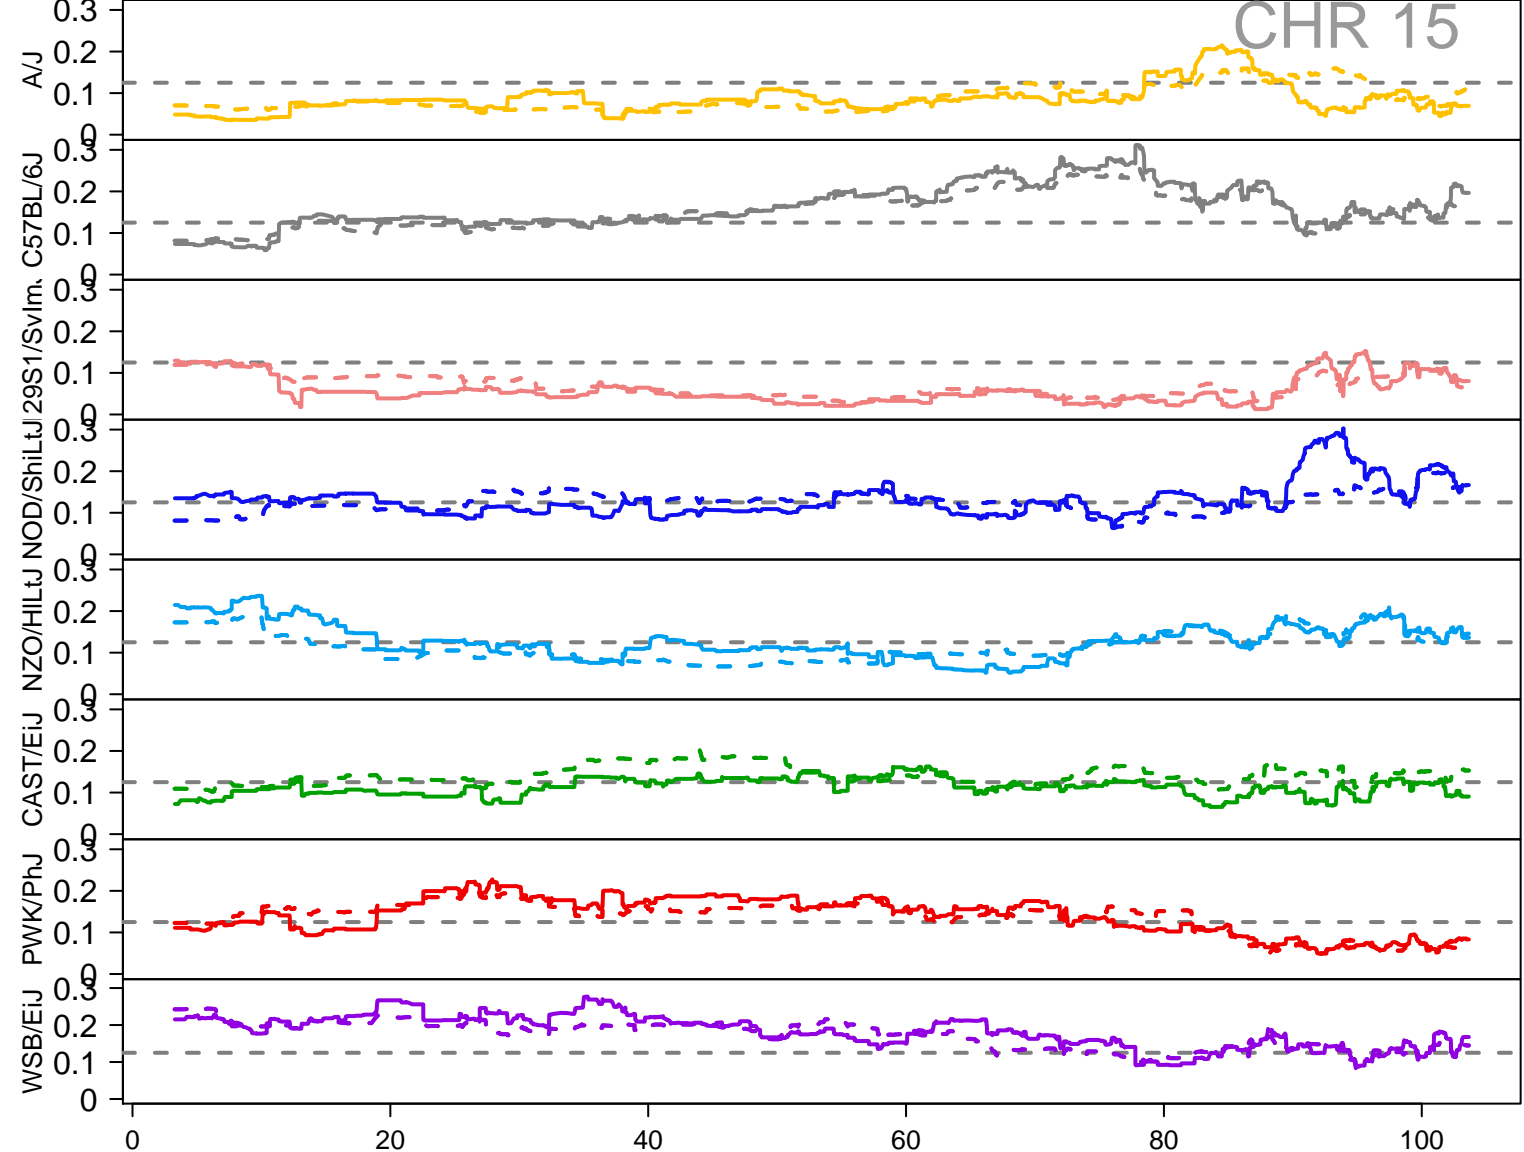

CHR 16

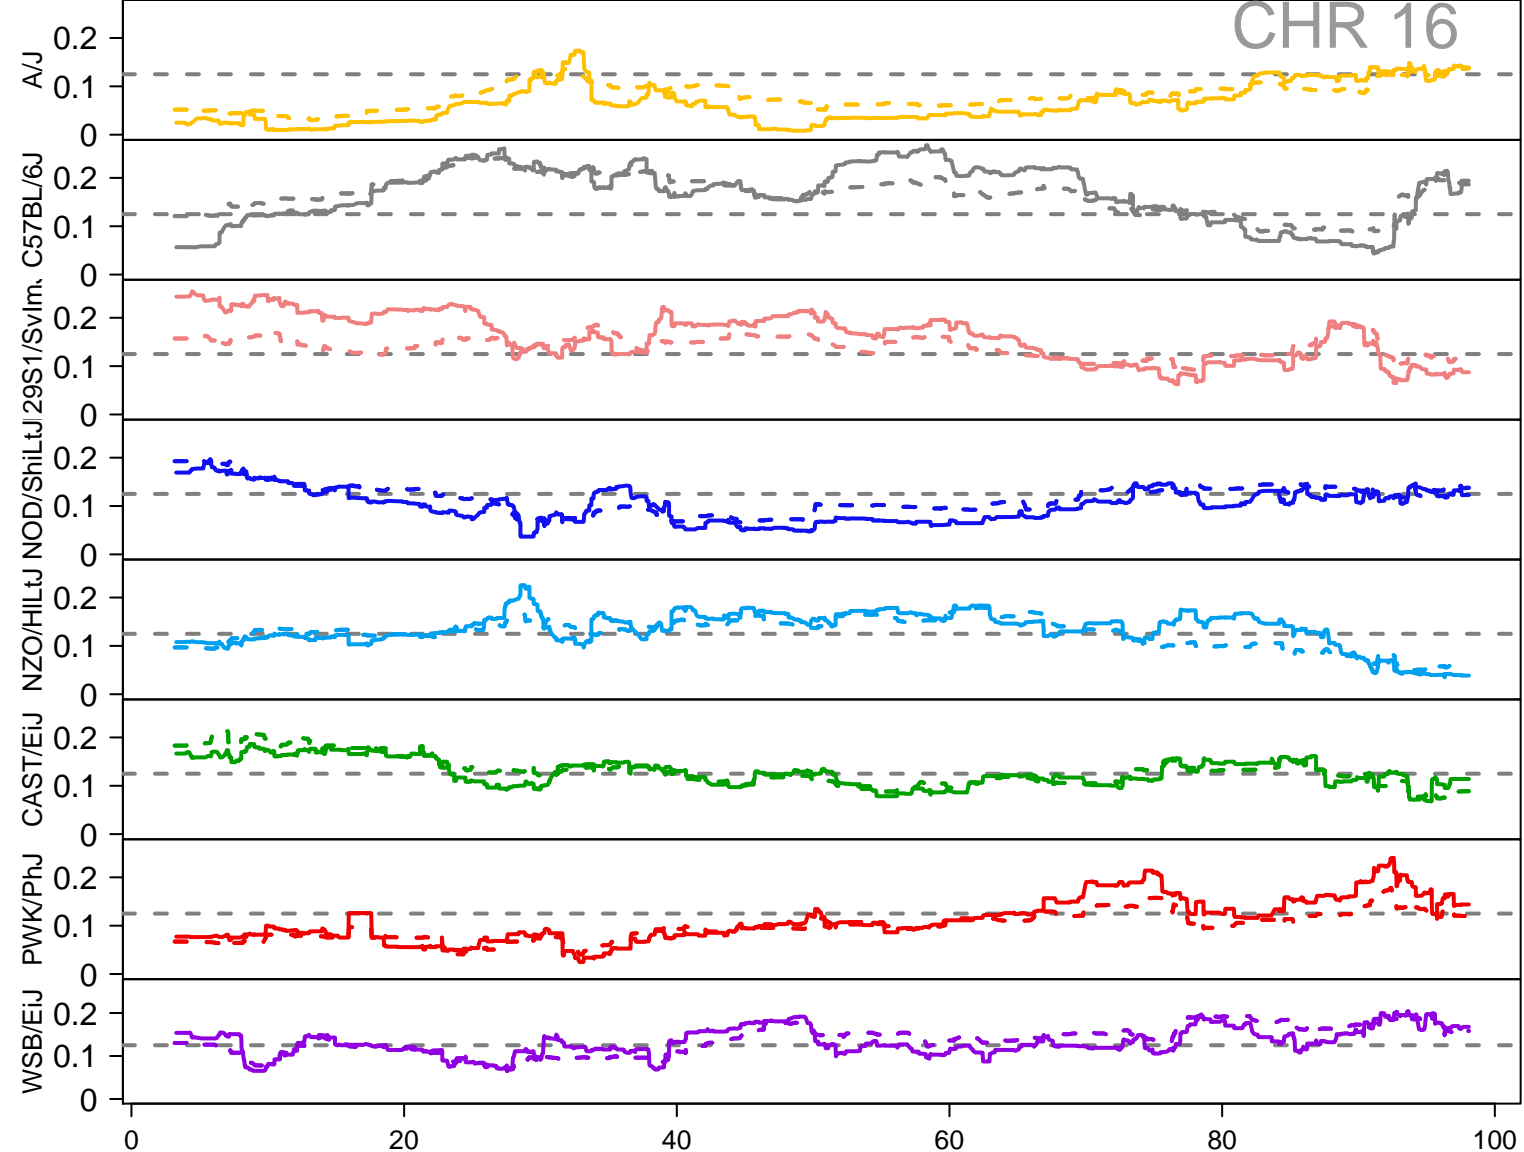



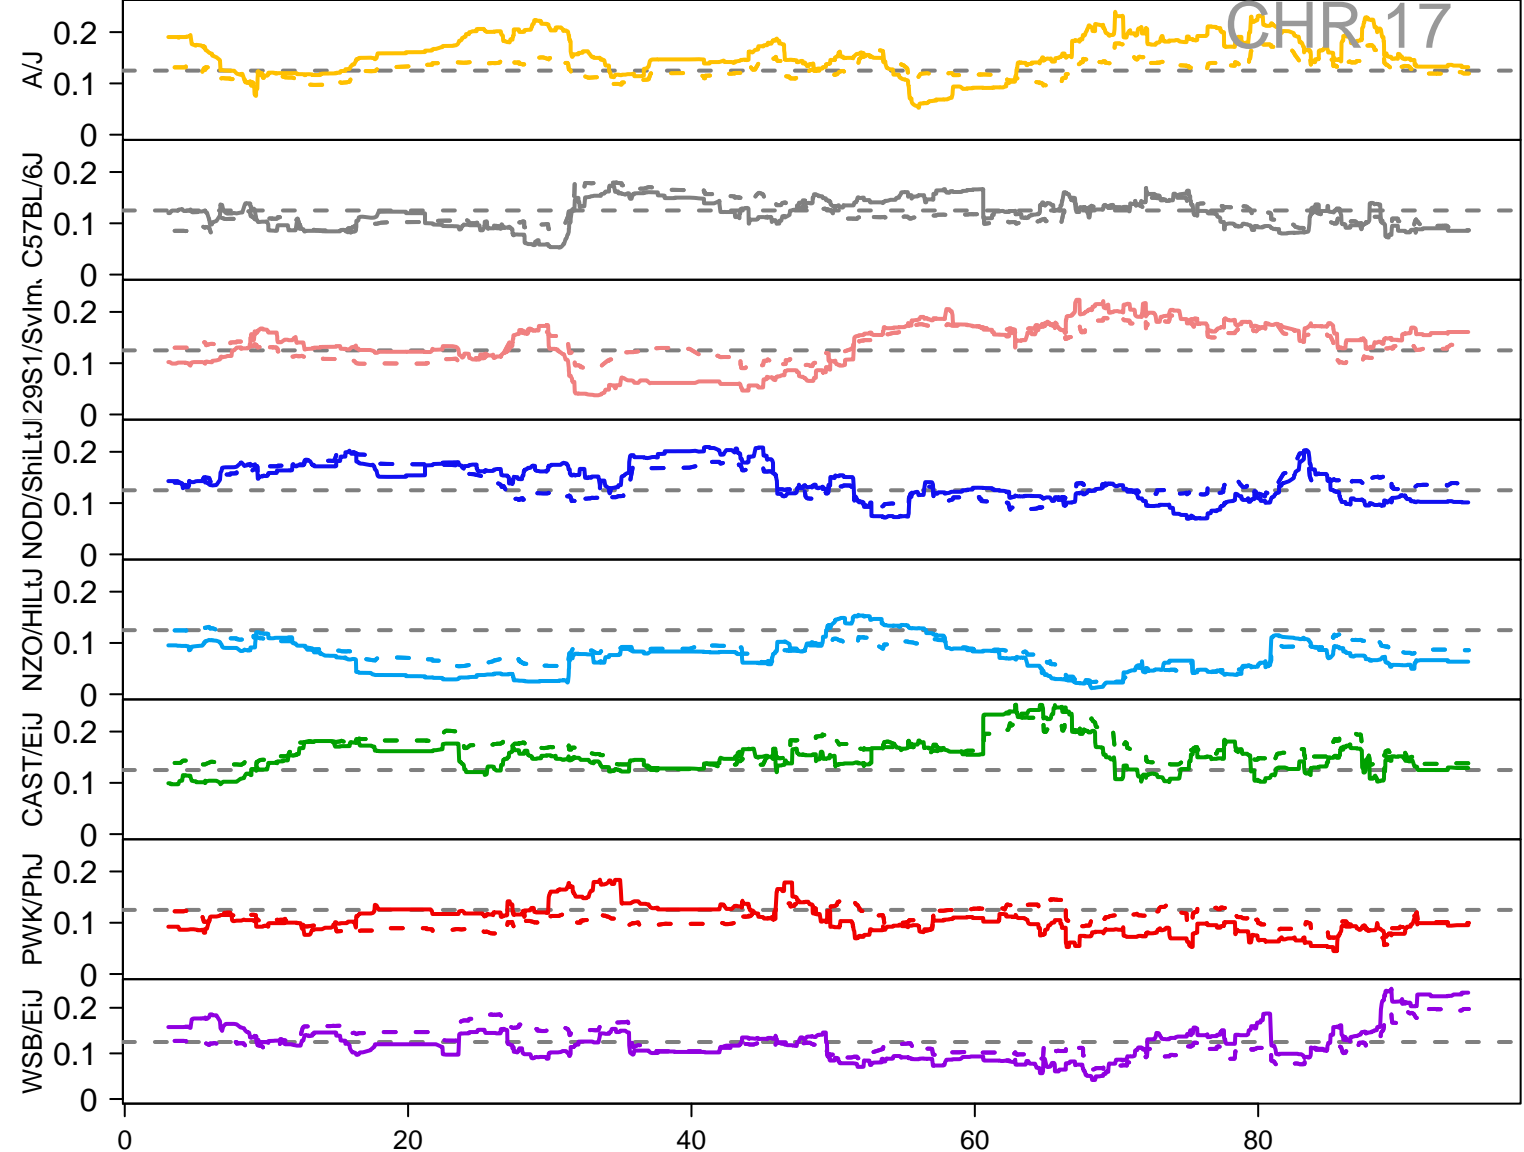

CHR 18

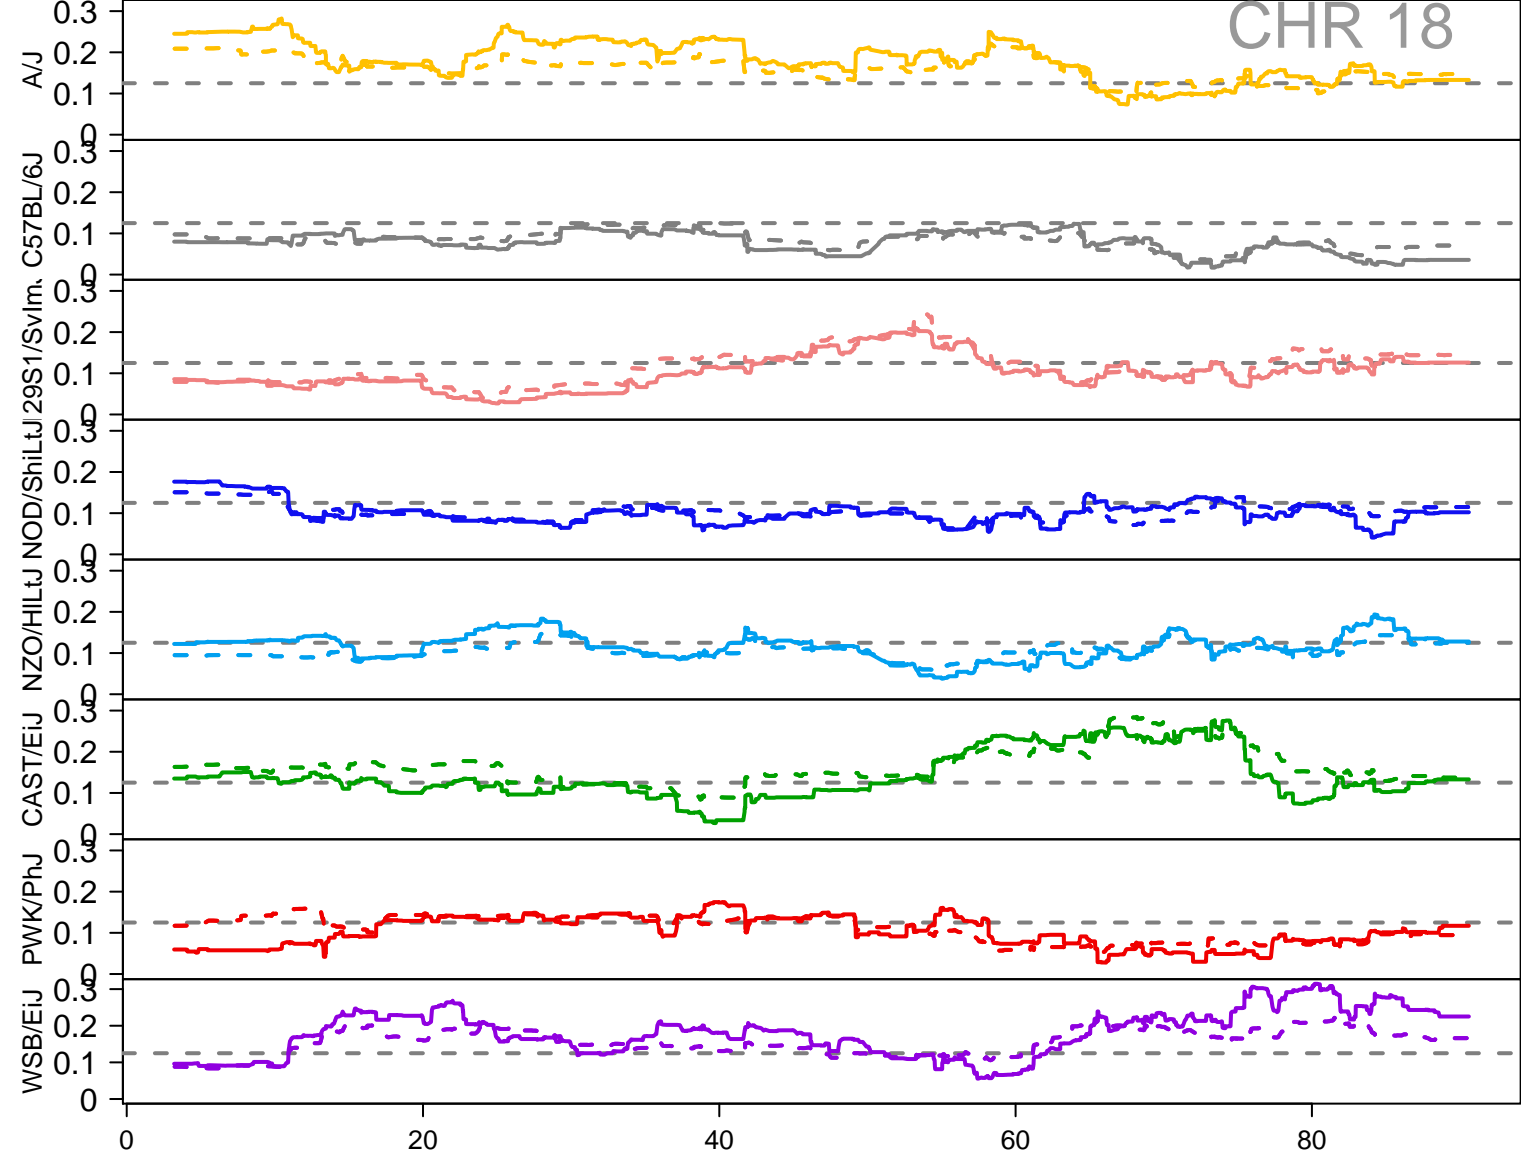

# CHR 19

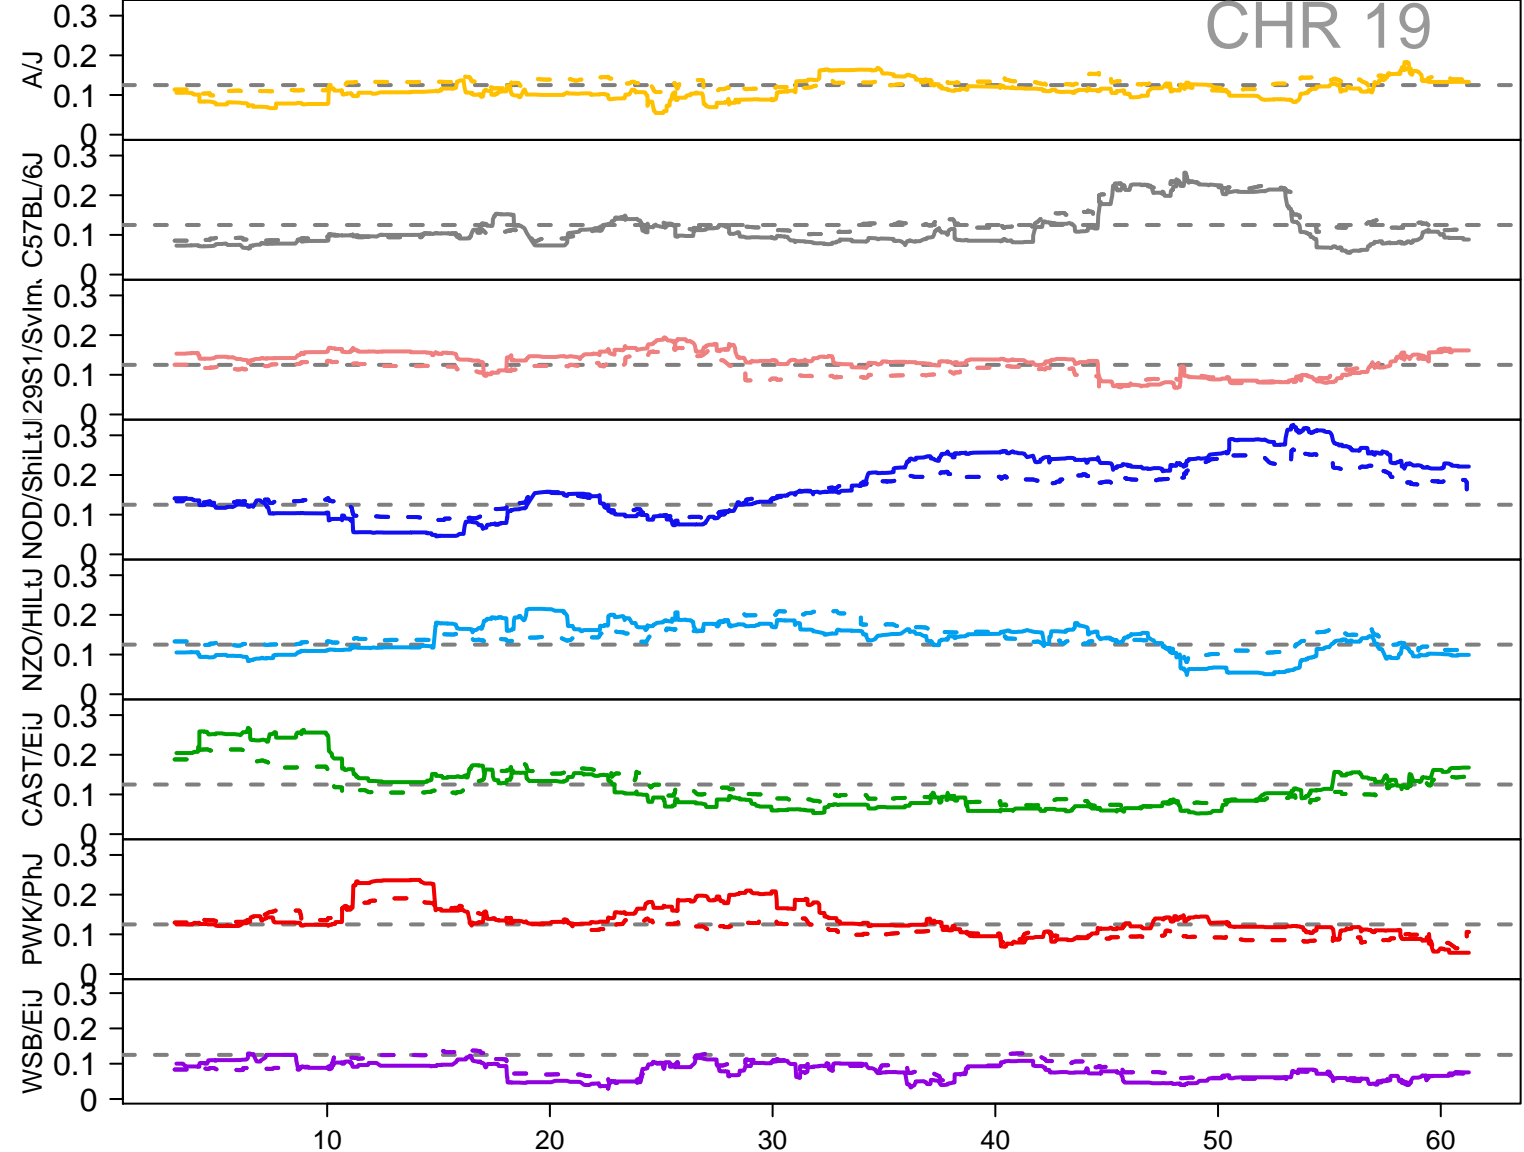

CHR X

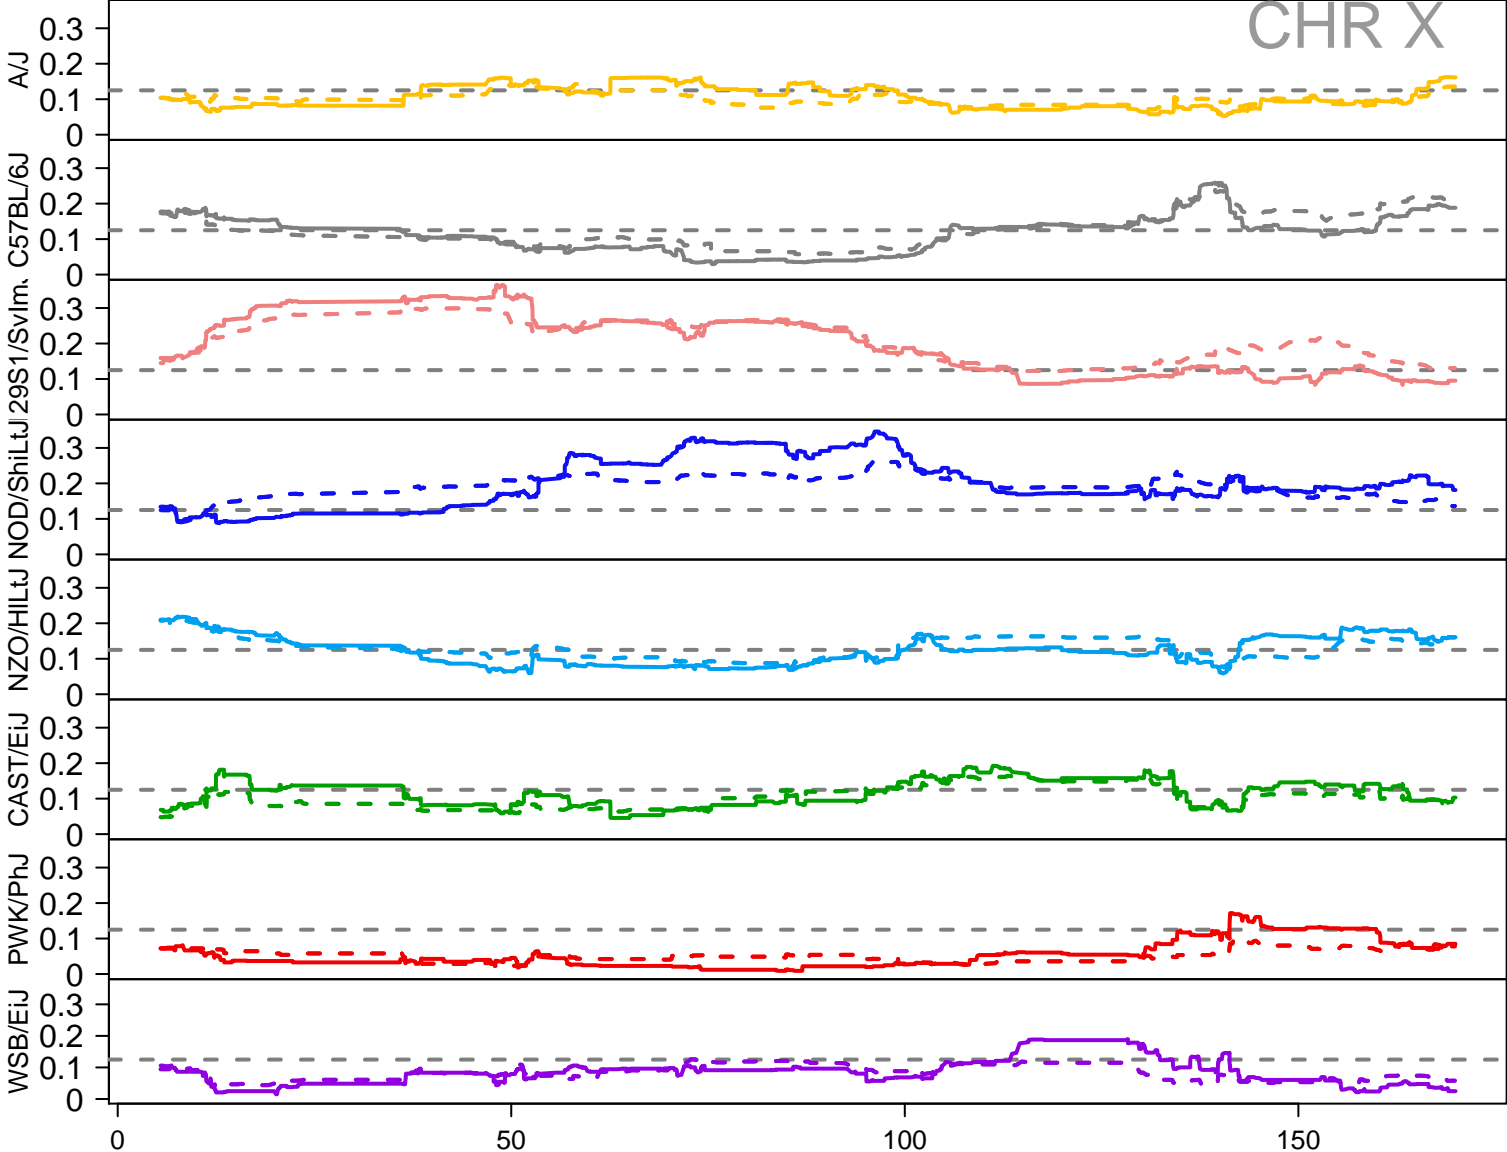

Supplement: 3893FileS3.pdf [file 3893FileS3.pdf]
