# Supplementary material for: Diversity Outbred Mice at 21: Maintaining Allelic Variation in the Face of Selection
Source: PubMed Central journal article supplement (PMC5144960; doi:10.1534/g3.116.035527), 2016-09-29

**A****G11: A/J SNPs**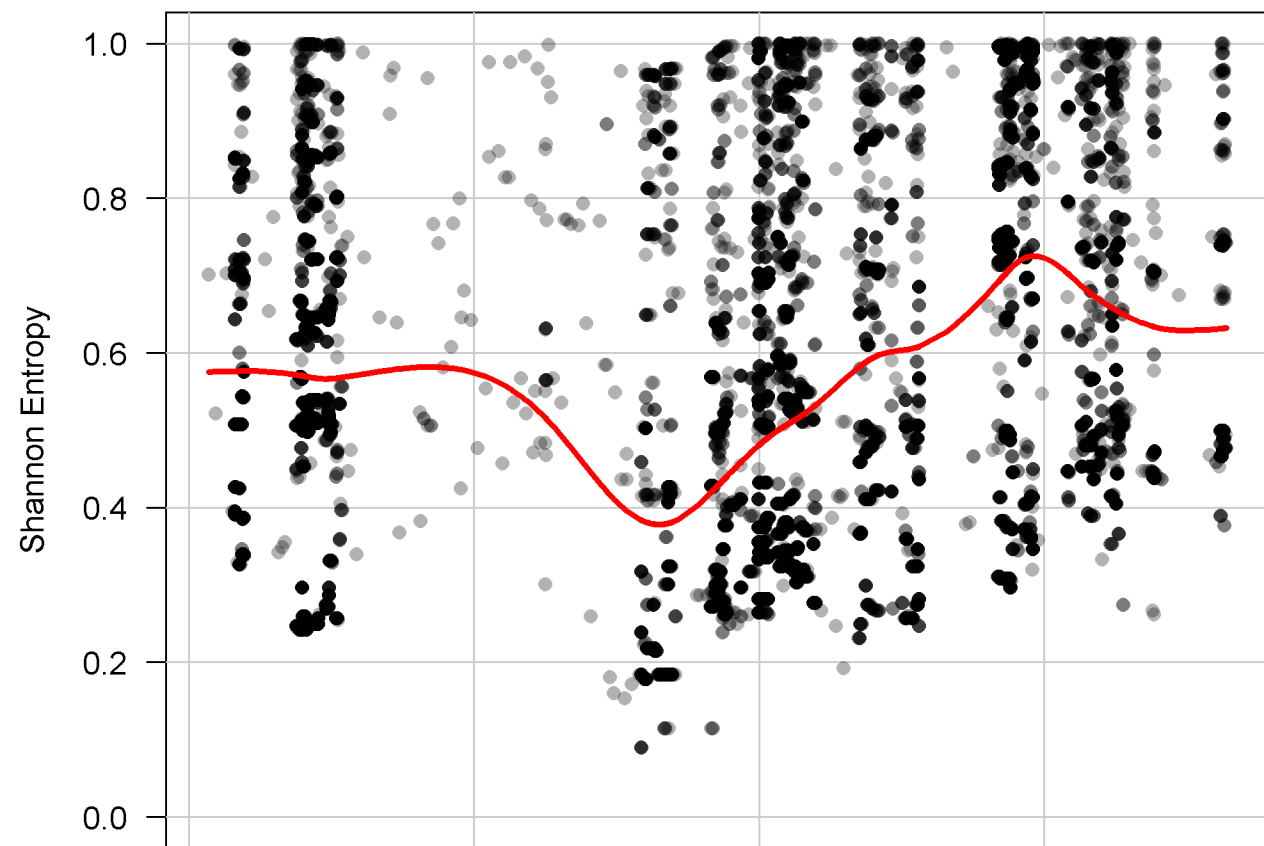**B****G21 A/J SNPs**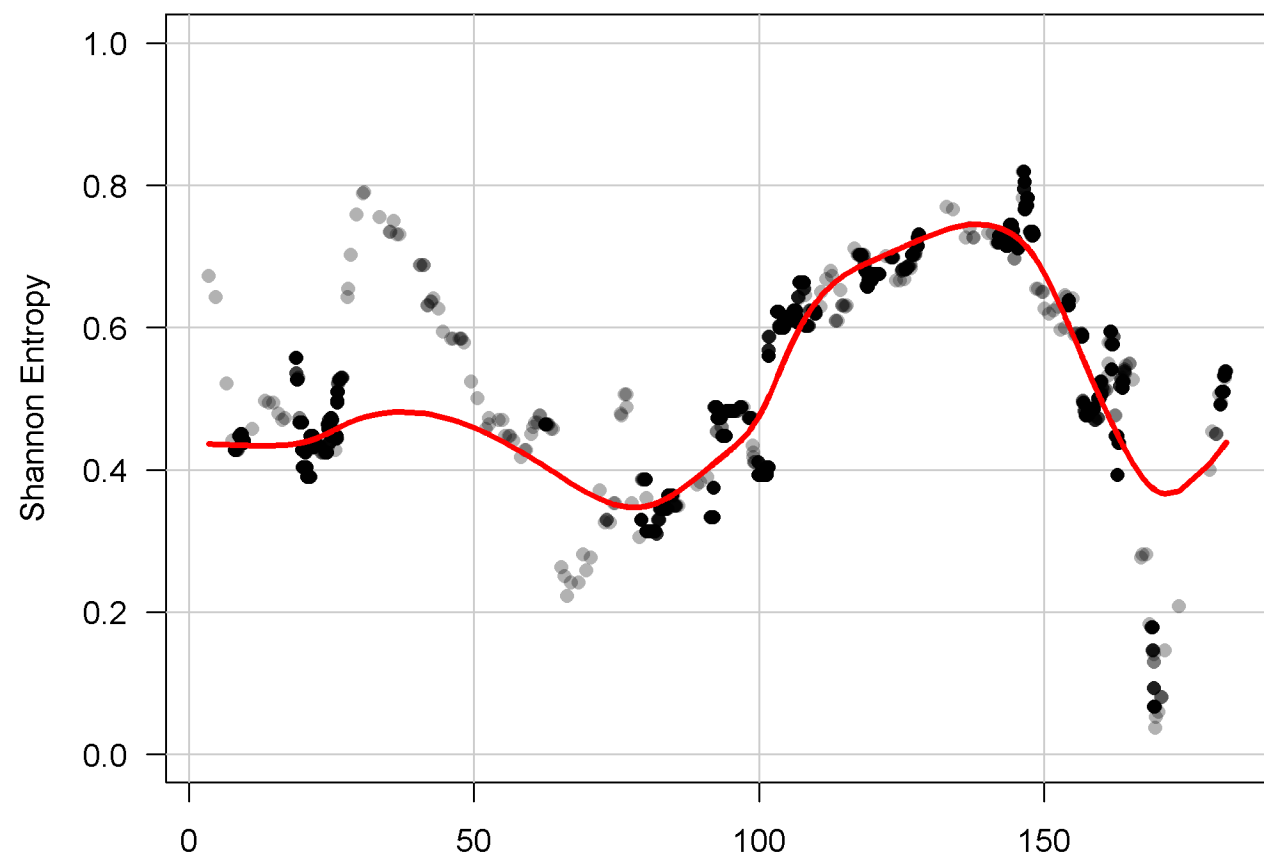

**A****G11: C57BL/6J SNPs**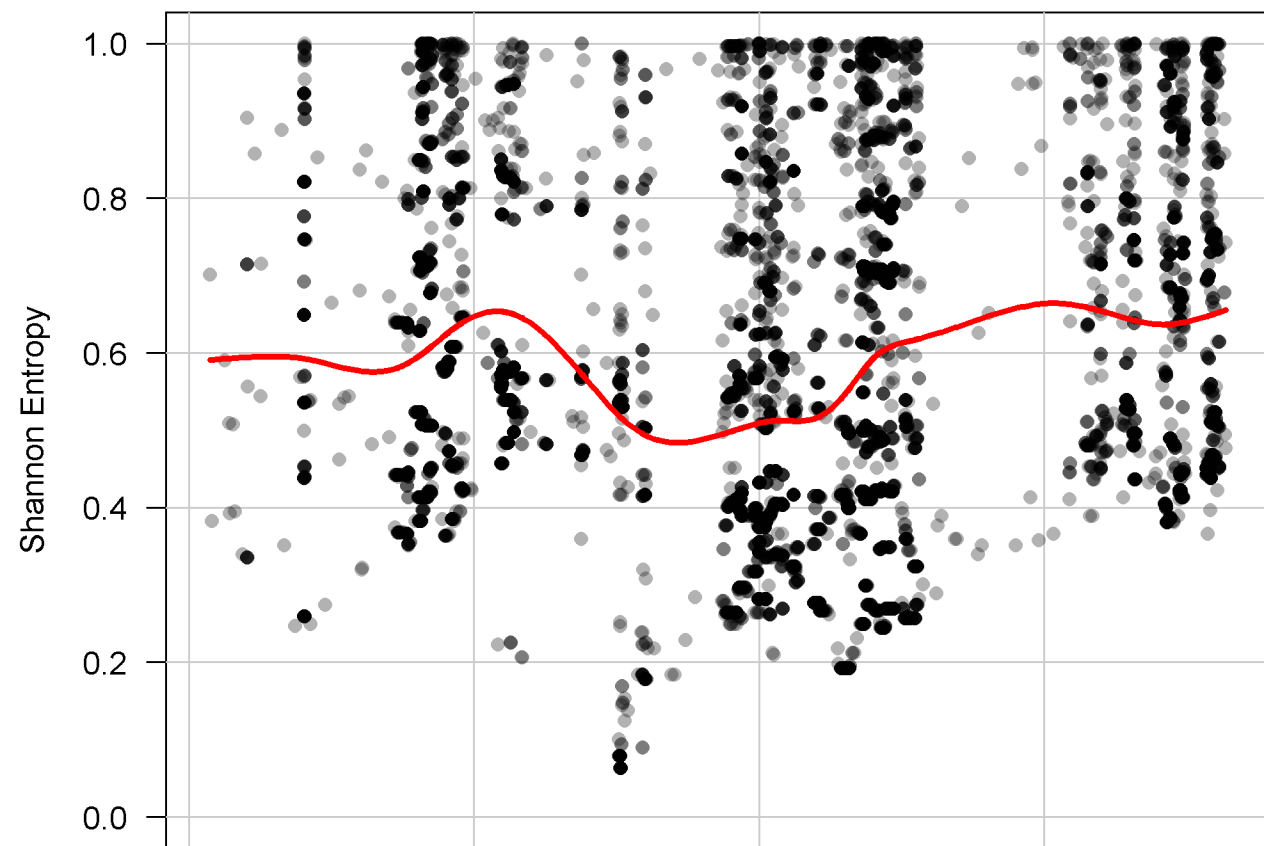**B****G21 C57BL/6J SNPs**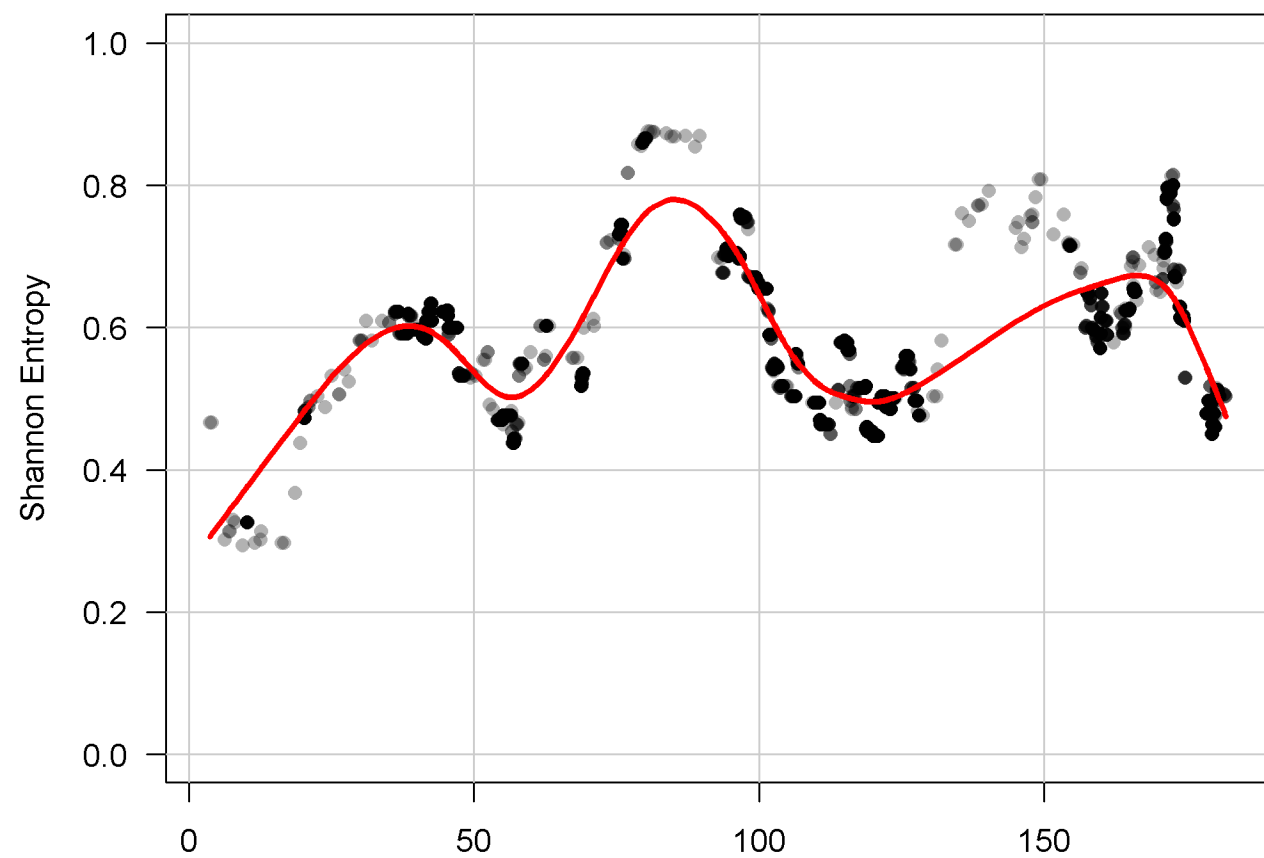

**A****G11: 129S1/SvImJ SNPs**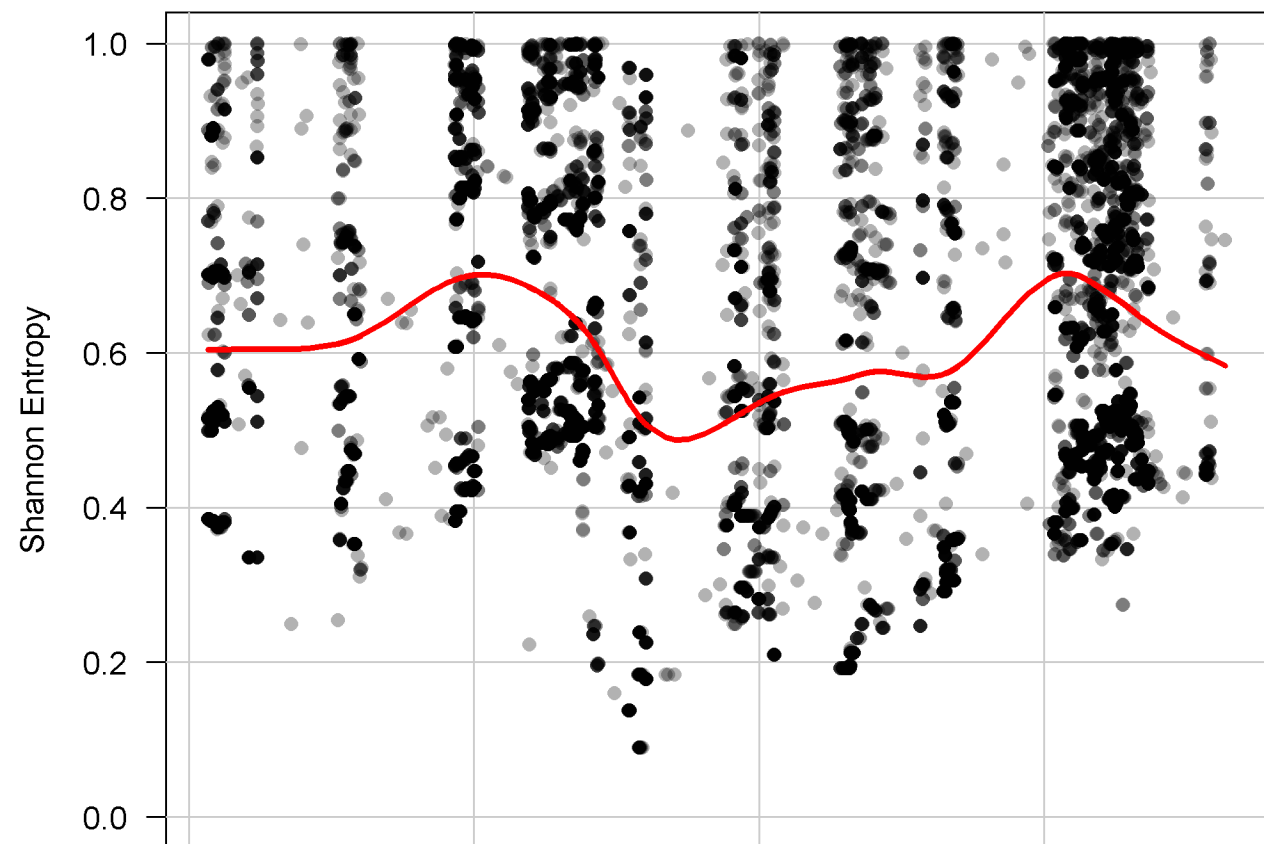**B****G21 129S1/SvImJ SNPs**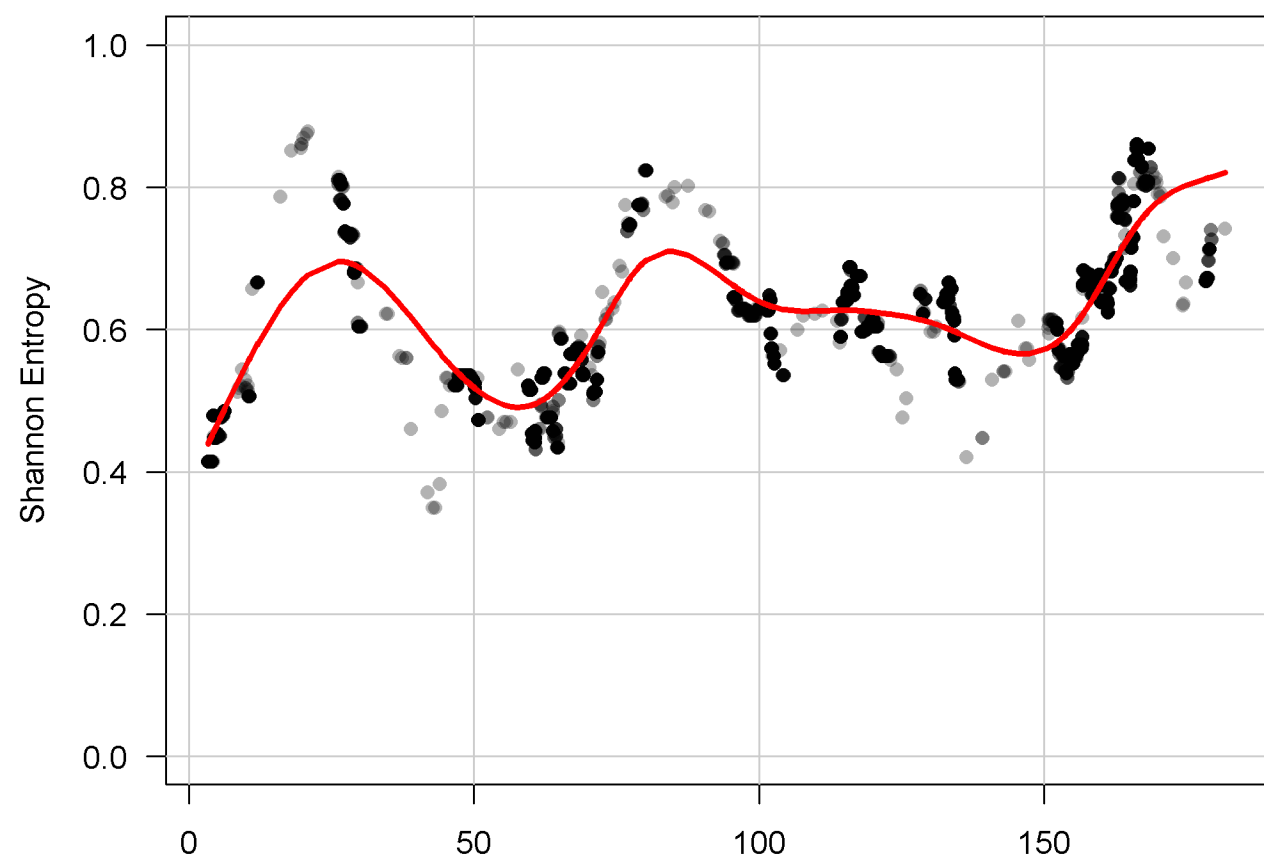

**A****G11: NOD/ShiLtJ SNPs**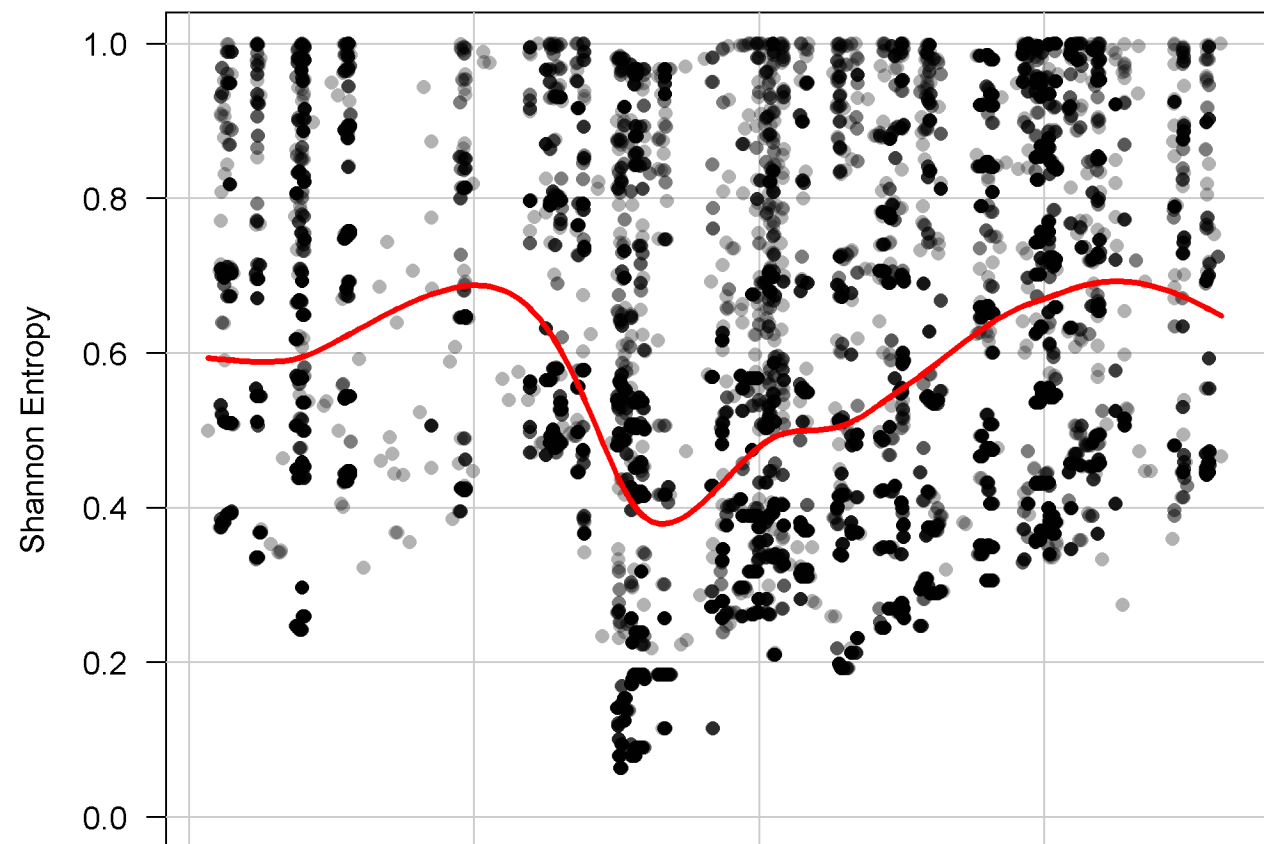**B****G21 NOD/ShiLtJ SNPs**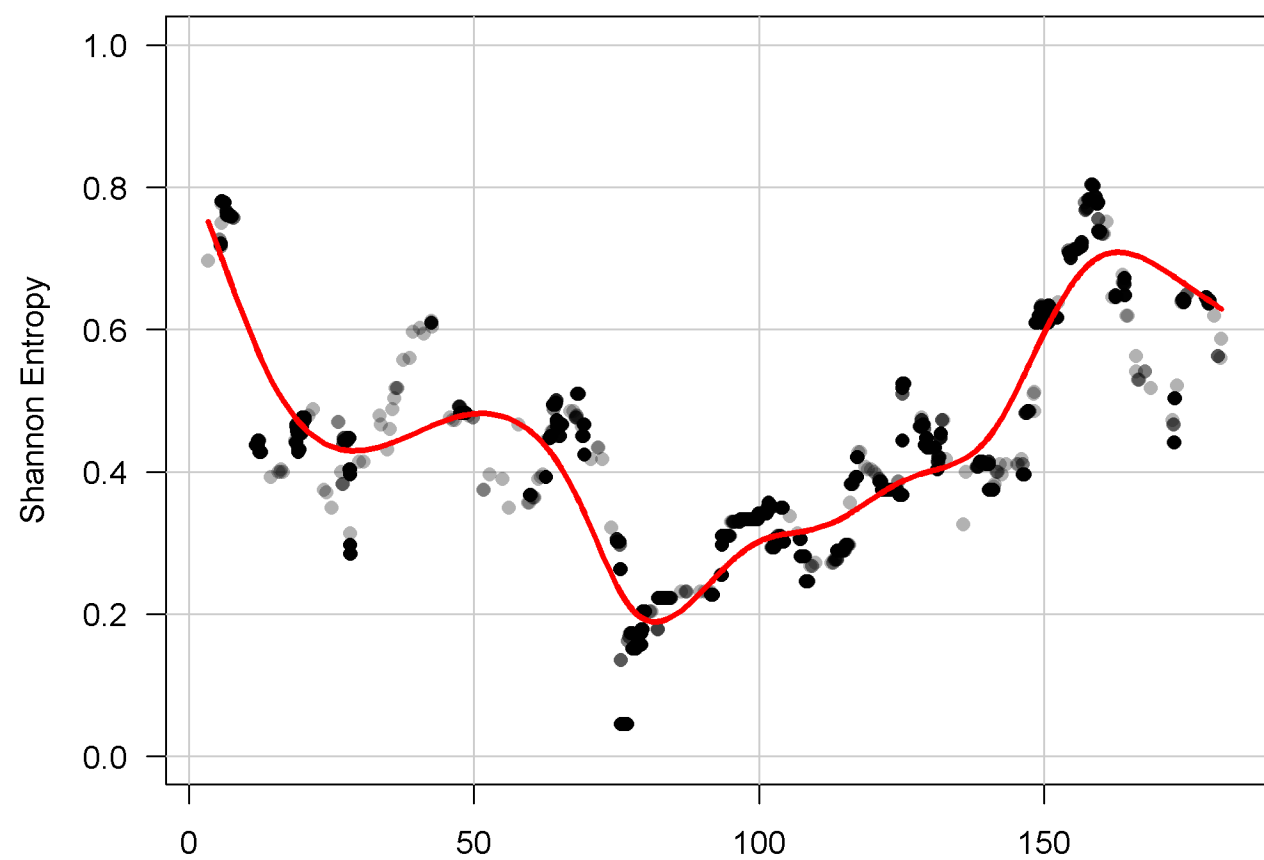

**A****G11: NZO/HILtJ SNPs**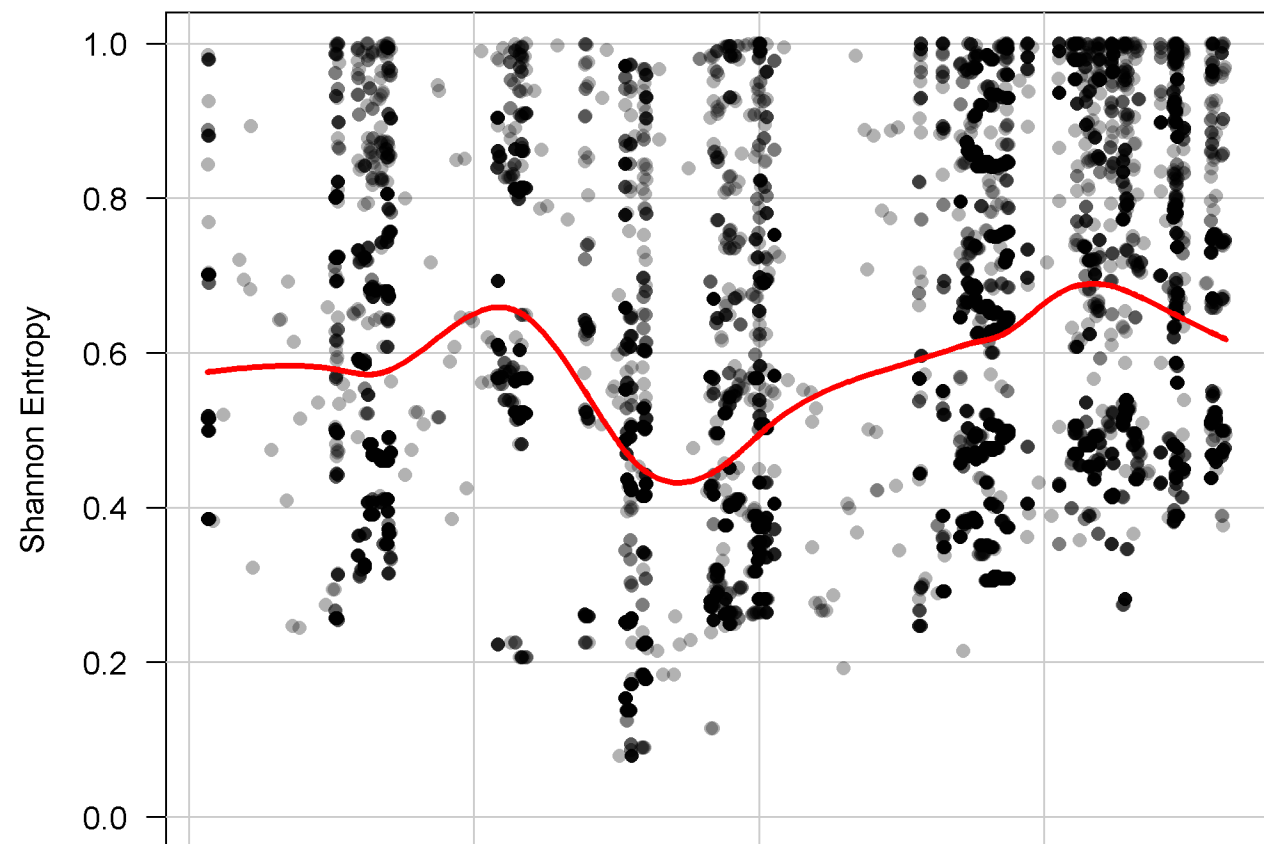**B****G21 NZO/HILtJ SNPs**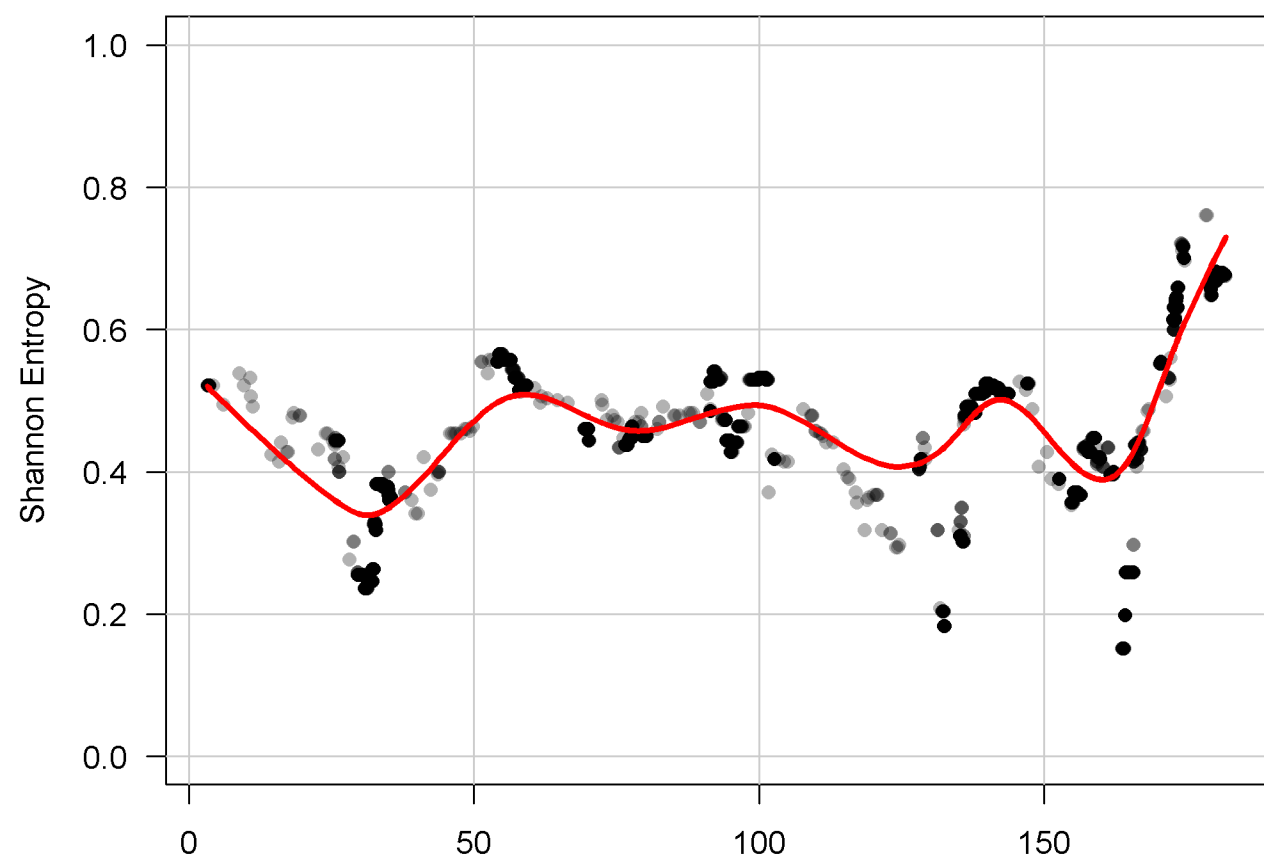

**A****G11: CAST/EiJ SNPs**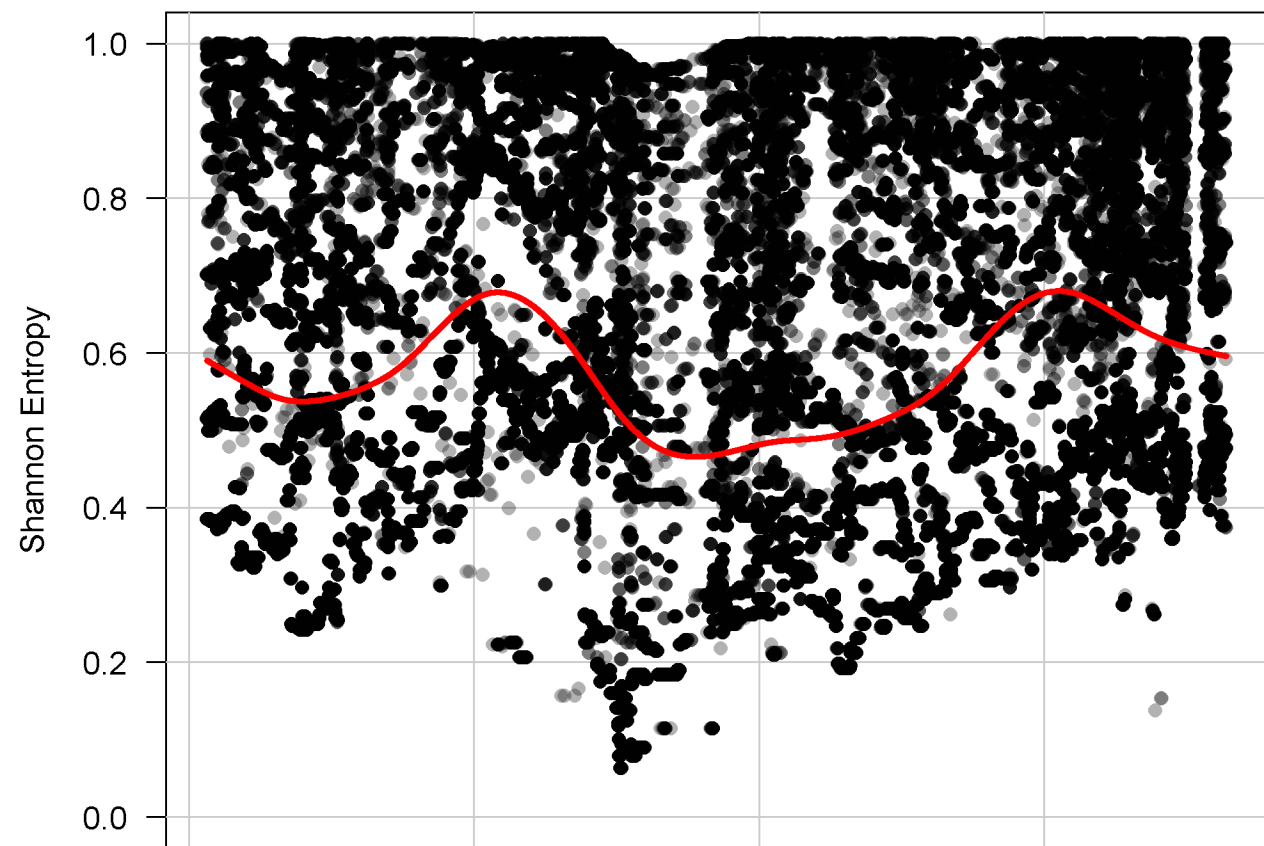**B****G21 CAST/EiJ SNPs**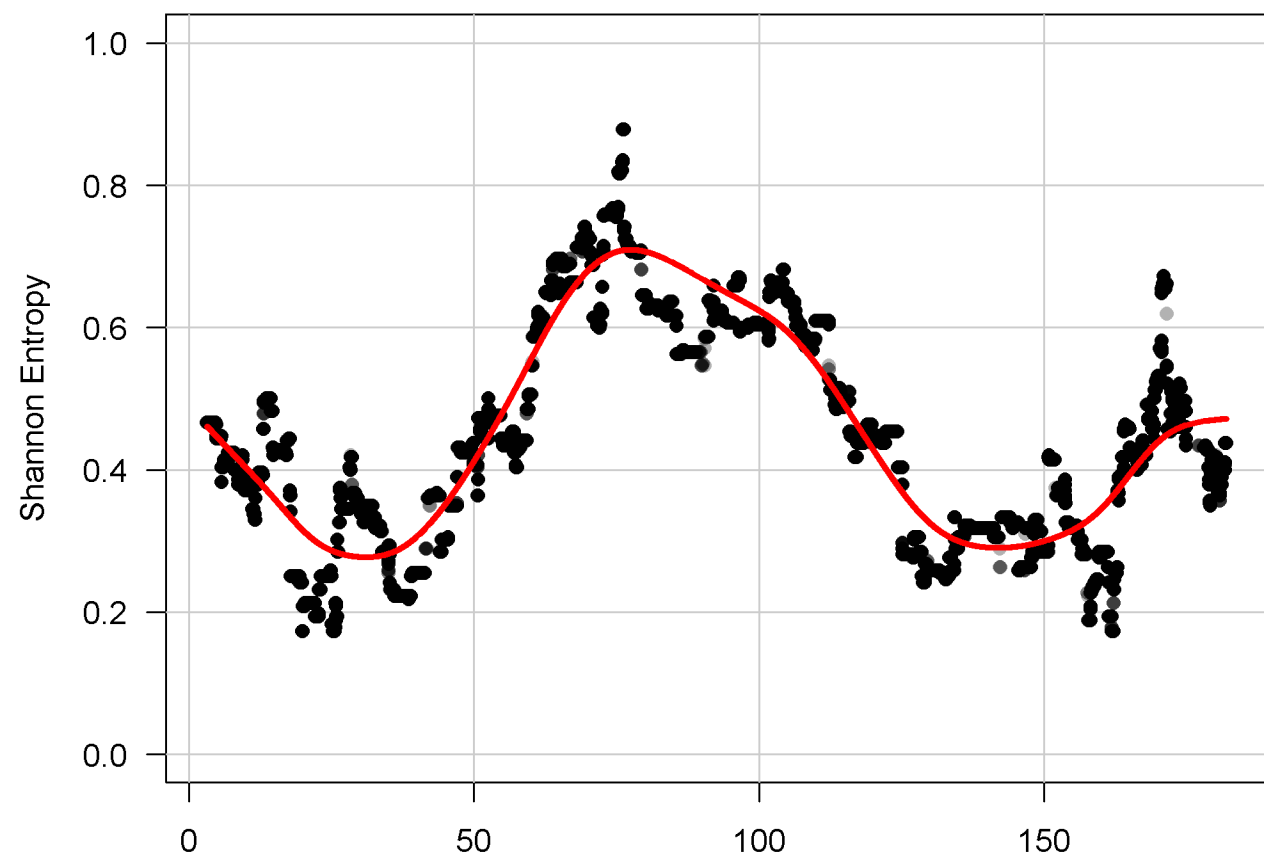

**A****G11: PWK/PhJ SNPs**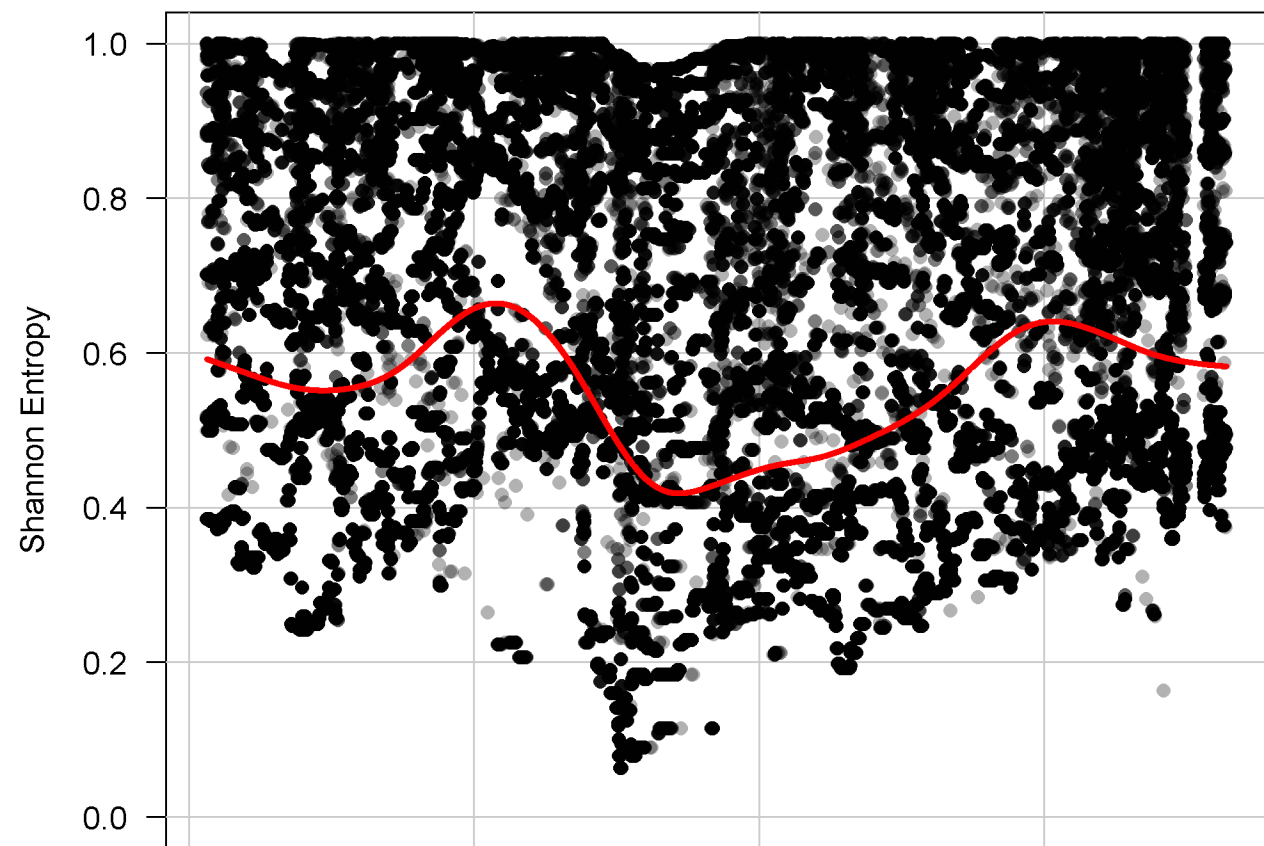**B****G21 PWK/PhJ SNPs**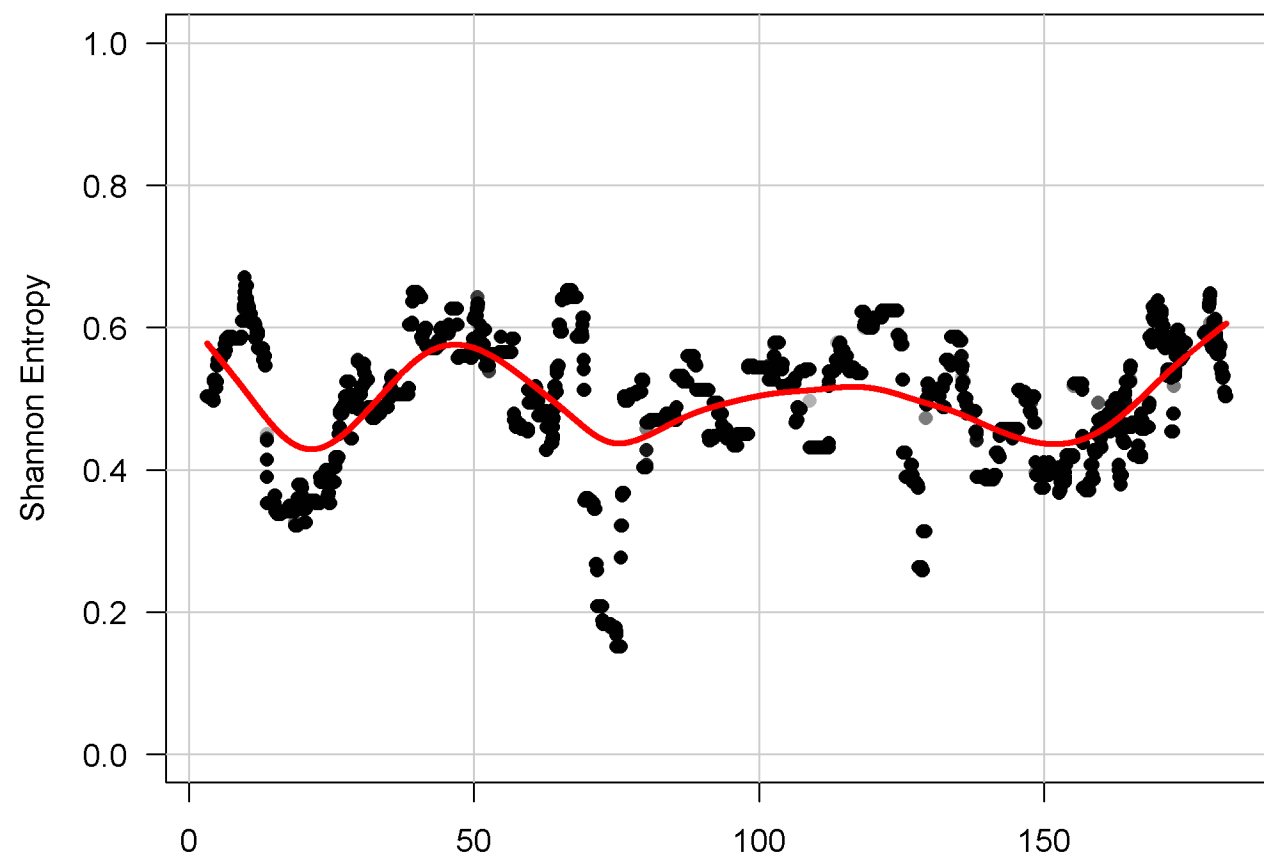

**A****G11: WSB/EiJ SNPs**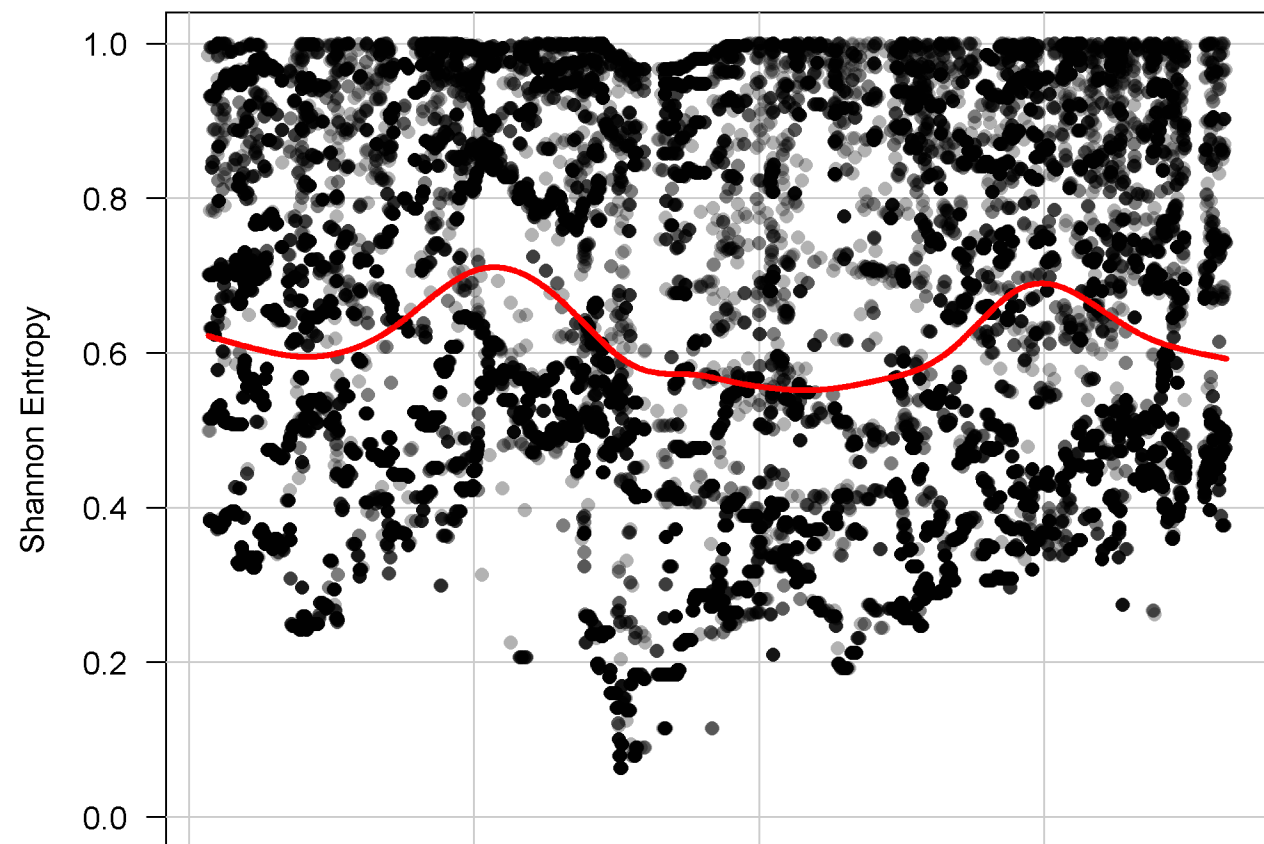**B****G21 WSB/EiJ SNPs**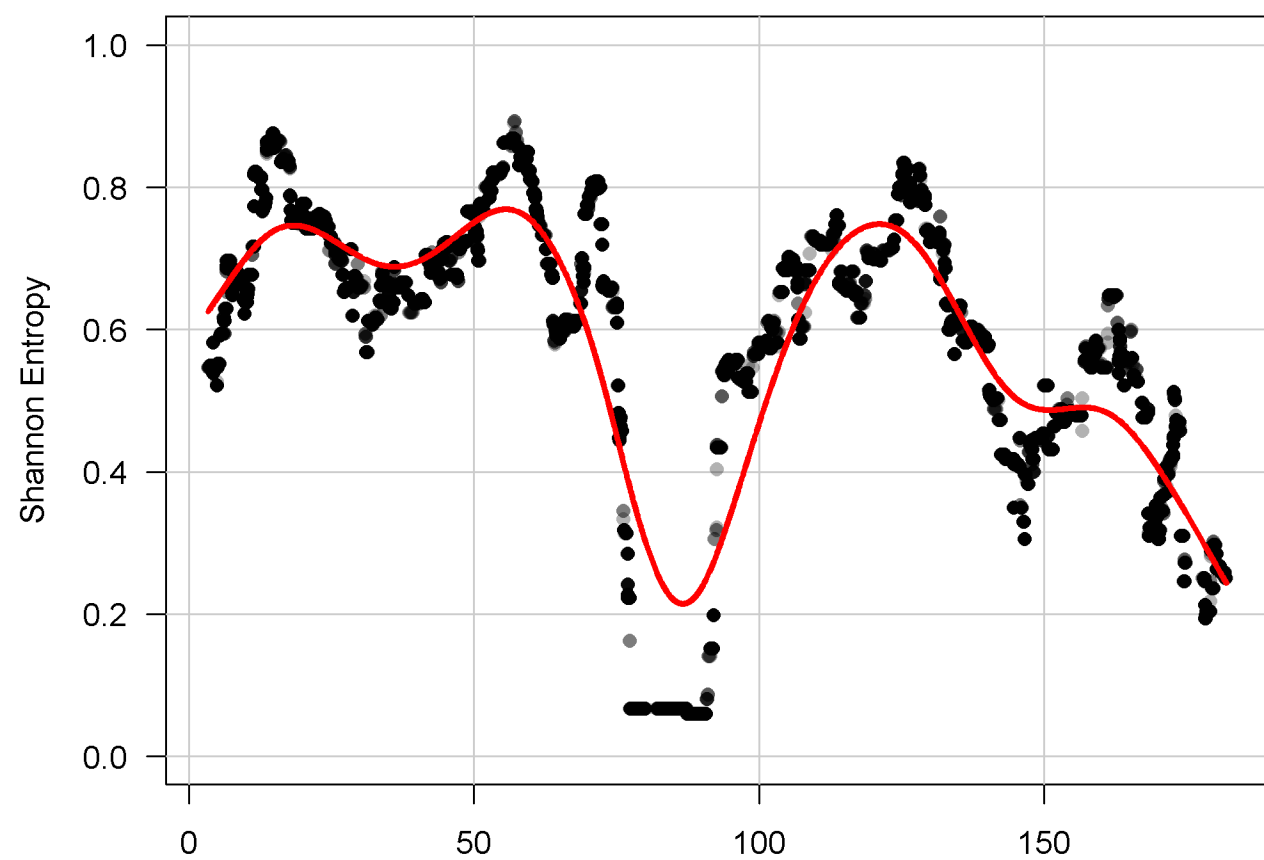

Supplement: 3893FileS4.pdf [file 3893FileS4.pdf]
